# Supplementary material for: Lysosomal polygenic risk is associated with the severity of neuropathology in Lewy body disease
Source: PubMed Central journal article supplement — Brain. 2023 May 29;146(10):4077–87. doi: 10.1093/brain/awad183 (PMC10545498; doi:10.1093/brain/awad183), 2023-05-29
Supplement: awad183_supplementary_data.pdf [file awad183_supplementary_data.pdf]

## Supplementary material: Lysosomal polygenic risk is associated with the severity of neuropathology in Lewy body disease

Contents: Supplementary table I - 25

**Supplementary table I:** Number of SNPs used to build each PRS in the NBB and Mayo Clinic samples.

| PRS                                   | NBB SNPs, n | Mayo Clinic SNPs, n | SNPs in common, n |
|---------------------------------------|-------------|---------------------|-------------------|
| <b>PD-PRS</b>                         | 181         | 186                 | 180               |
| <b>Adaptive immunity</b>              | 17          | 17                  | 17                |
| <b>Alpha synuclein</b>                | 9           | 7                   | 7                 |
| <b>Endocytic membrane trafficking</b> | 10          | 9                   | 9                 |
| <b>Innate immunity</b>                | 10          | 10                  | 10                |
| <b>Lysosomal</b>                      | 12          | 12                  | 11                |
| <b>Lysosomal excluding GBA</b>        | 11          | 11                  | 11                |
| <b>Microglia</b>                      | 45          | 45                  | 45                |
| <b>Mitochondria</b>                   | 2           | 2                   | 2                 |
| <b>Monocytes</b>                      | 44          | 44                  | 44                |
| <b>AD-PRS</b>                         | 81          | 82                  | 78                |
| <b>AD-PRS excluding APOE</b>          | 34          | 34                  | 34                |

## Supplementary table 2: SNPs used to calculate the PD-PRS (NBB)

Description of SNPs, weights and p values used to calculate the PD-PRS in NBB samples.

| CHR | BP        | SNP         | A1 | A2 | freq   | beta (weight) | P        |
|-----|-----------|-------------|----|----|--------|---------------|----------|
| 1   | 155014968 | 1:155014968 | T  | G  | 0.9864 | -0.2715       | 1.33E-08 |
| 1   | 155033317 | 1:155033317 | T  | C  | 0.3189 | 0.0724        | 7.92E-13 |
| 1   | 155135036 | 1:155135036 | A  | G  | 0.0169 | 0.6068        | 1.72E-70 |
| 1   | 155685477 | 1:155685477 | A  | G  | 0.9082 | -0.1133       | 2.09E-09 |
| 1   | 156007988 | 1:156007988 | A  | G  | 0.0192 | 0.4784        | 2.87E-39 |
| 1   | 156300731 | 1:156300731 | T  | C  | 0.9828 | -0.3482       | 1.06E-10 |
| 1   | 161478859 | 1:161478859 | T  | C  | 0.4948 | -0.0643       | 8.03E-12 |
| 1   | 161617516 | 1:161617516 | A  | G  | 0.8556 | -0.1042       | 2.48E-08 |
| 1   | 171719769 | 1:171719769 | T  | C  | 0.1949 | -0.0704       | 4.47E-09 |
| 1   | 205642390 | 1:205642390 | T  | C  | 0.182  | 0.0886        | 6.08E-13 |
| 1   | 205723572 | 1:205723572 | T  | C  | 0.566  | 0.1066        | 1.11E-29 |
| 1   | 205723619 | 1:205723619 | A  | C  | 0.0503 | -0.1369       | 7.64E-10 |
| 1   | 226916078 | 1:226916078 | T  | C  | 0.7196 | 0.0833        | 1.38E-15 |
| 1   | 226983330 | 1:226983330 | T  | C  | 0.7796 | -0.0794       | 1.21E-11 |
| 1   | 232669682 | 1:232669682 | T  | G  | 0.1418 | 0.1113        | 4.94E-17 |
| 2   | 96025765  | 2:96025765  | A  | G  | 0.8428 | 0.0783        | 1.63E-08 |
| 2   | 102468624 | 2:102468624 | A  | G  | 0.7042 | 0.0762        | 1.27E-12 |
| 2   | 135443940 | 2:135443940 | A  | G  | 0.8109 | 0.0757        | 1.22E-09 |
| 2   | 135464616 | 2:135464616 | A  | G  | 0.7185 | 0.0807        | 4.55E-14 |
| 2   | 168979290 | 2:168979290 | T  | C  | 0.3351 | -0.0563       | 3.50E-08 |
| 2   | 169023263 | 2:169023263 | T  | C  | 0.9867 | -0.3186       | 4.03E-11 |
| 2   | 169110394 | 2:169110394 | T  | C  | 0.1312 | 0.1796        | 2.54E-39 |
| 2   | 169161223 | 2:169161223 | T  | C  | 0.6061 | 0.0541        | 4.49E-08 |
| 3   | 18361759  | 3:18361759  | A  | C  | 0.9592 | -0.1693       | 5.94E-13 |
| 3   | 28700178  | 3:28700178  | A  | G  | 0.3782 | 0.0655        | 7.94E-12 |
| 3   | 48333546  | 3:48333546  | T  | C  | 0.4867 | -0.0612       | 7.65E-09 |
| 3   | 48748989  | 3:48748989  | T  | G  | 0.6476 | 0.0636        | 1.36E-10 |

|   |           |             |   |   |        |         |           |
|---|-----------|-------------|---|---|--------|---------|-----------|
| 3 | 49025101  | 3:49025101  | A | C | 0.3425 | -0.0584 | 4.04E-09  |
| 3 | 122196892 | 3:122196892 | T | C | 0.1722 | 0.0861  | 9.98E-12  |
| 3 | 151112968 | 3:151112968 | A | C | 0.3691 | -0.0631 | 9.53E-11  |
| 3 | 161077630 | 3:161077630 | A | G | 0.6742 | -0.0616 | 5.01E-10  |
| 3 | 182760073 | 3:182760073 | T | G | 0.8112 | 0.1485  | 1.22E-34  |
| 3 | 182852214 | 3:182852214 | T | C | 0.0213 | -0.2404 | 4.01E-08  |
| 4 | 734351    | 4:734351    | A | G | 0.4825 | 0.0678  | 1.49E-12  |
| 4 | 759463    | 4:759463    | A | G | 0.0838 | 0.0927  | 3.36E-08  |
| 4 | 802144    | 4:802144    | T | C | 0.0354 | -0.2113 | 1.65E-12  |
| 4 | 925149    | 4:925149    | T | C | 0.6308 | 0.1074  | 1.36E-27  |
| 4 | 951161    | 4:951161    | T | C | 0.1656 | 0.1127  | 2.44E-19  |
| 4 | 951947    | 4:951947    | T | C | 0.8065 | -0.2126 | 9.98E-70  |
| 4 | 982345    | 4:982345    | T | C | 0.0237 | 0.2103  | 2.88E-09  |
| 4 | 15620408  | 4:15620408  | T | C | 0.9022 | 0.1014  | 2.53E-10  |
| 4 | 15737348  | 4:15737348  | A | G | 0.5529 | 0.1035  | 2.06E-28  |
| 4 | 15757601  | 4:15757601  | T | C | 0.9593 | 0.1785  | 6.27E-13  |
| 4 | 15829612  | 4:15829612  | A | G | 0.3186 | 0.0574  | 1.03E-08  |
| 4 | 17976846  | 4:17976846  | A | C | 0.163  | -0.0818 | 3.16E-10  |
| 4 | 77111032  | 4:77111032  | T | C | 0.3099 | -0.0624 | 9.53E-10  |
| 4 | 77147969  | 4:77147969  | A | G | 0.7107 | -0.0912 | 4.97E-19  |
| 4 | 77198054  | 4:77198054  | T | C | 0.3632 | -0.0912 | 5.82E-21  |
| 4 | 77202861  | 4:77202861  | A | G | 0.4148 | -0.0546 | 4.30E-08  |
| 4 | 77280542  | 4:77280542  | A | G | 0.0686 | 0.1309  | 1.61E-08  |
| 4 | 90368545  | 4:90368545  | A | G | 0.0299 | 0.1983  | 1.75E-10  |
| 4 | 90431418  | 4:90431418  | T | C | 0.3673 | 0.0695  | 1.32E-12  |
| 4 | 90474291  | 4:90474291  | T | C | 0.6745 | 0.0684  | 1.08E-11  |
| 4 | 90503603  | 4:90503603  | A | G | 0.0529 | 0.1383  | 2.72E-10  |
| 4 | 90594987  | 4:90594987  | A | G | 0.209  | -0.0995 | 1.93E-13  |
| 4 | 90606518  | 4:90606518  | T | G | 0.8674 | 0.1055  | 4.16E-13  |
| 4 | 90608959  | 4:90608959  | T | C | 0.1171 | -0.1109 | 1.44E-13  |
| 4 | 90626111  | 4:90626111  | A | G | 0.6278 | -0.2774 | 3.89E-154 |
| 4 | 90653134  | 4:90653134  | T | C | 0.0833 | 0.1586  | 1.12E-15  |
| 4 | 90684278  | 4:90684278  | A | G | 0.9264 | -0.337  | 3.03E-82  |
| 4 | 90742296  | 4:90742296  | A | G | 0.0115 | -0.2565 | 4.16E-08  |
| 4 | 90757294  | 4:90757294  | A | C | 0.2115 | -0.2042 | 2.21E-68  |
| 4 | 90774120  | 4:90774120  | T | C | 0.9687 | 0.2697  | 1.13E-13  |
| 4 | 90803192  | 4:90803192  | T | C | 0.0361 | -0.1975 | 4.93E-13  |
| 4 | 90835558  | 4:90835558  | T | C | 0.0374 | 0.1871  | 1.83E-10  |
| 4 | 90843448  | 4:90843448  | T | G | 0.043  | 0.1272  | 4.48E-08  |
| 4 | 90848275  | 4:90848275  | T | G | 0.9335 | -0.1765 | 1.06E-15  |
| 4 | 91010118  | 4:91010118  | T | G | 0.9515 | -0.2539 | 2.00E-26  |
| 4 | 91024178  | 4:91024178  | T | G | 0.0331 | -0.2342 | 2.75E-08  |
| 4 | 91307991  | 4:91307991  | A | G | 0.971  | -0.2868 | 2.87E-21  |
| 4 | 114369065 | 4:114369065 | T | C | 0.1744 | 0.0875  | 9.82E-13  |
| 4 | 170583157 | 4:170583157 | A | G | 0.3264 | -0.0638 | 2.00E-10  |
| 5 | 59872406  | 5:59872406  | T | C | 0.0712 | 0.1302  | 7.92E-13  |
| 5 | 60137959  | 5:60137959  | A | G | 0.9019 | -0.1554 | 2.52E-23  |
| 5 | 60461194  | 5:60461194  | A | C | 0.1084 | 0.1393  | 7.37E-21  |
| 5 | 102363402 | 5:102363402 | T | C | 0.6996 | 0.0608  | 2.42E-09  |
| 5 | 124110273 | 5:124110273 | T | C | 0.0986 | 0.1141  | 1.02E-08  |
| 5 | 133930528 | 5:133930528 | A | G | 0.1025 | -0.0874 | 2.10E-08  |
| 5 | 134199105 | 5:134199105 | A | C | 0.102  | -0.0916 | 7.16E-09  |
| 6 | 27298905  | 6:27298905  | T | C | 0.2393 | 0.0614  | 1.41E-08  |
| 6 | 27564830  | 6:27564830  | A | G | 0.1231 | -0.0851 | 1.32E-08  |

|    |           |              |   |   |        |         |          |
|----|-----------|--------------|---|---|--------|---------|----------|
| 6  | 27738801  | 6:27738801   | A | G | 0.2081 | 0.0833  | 5.62E-12 |
| 6  | 28054198  | 6:28054198   | A | G | 0.9175 | -0.0926 | 2.94E-08 |
| 6  | 30108683  | 6:30108683   | T | C | 0.2451 | -0.0635 | 1.62E-08 |
| 6  | 31590354  | 6:31590354   | A | G | 0.8498 | -0.0752 | 1.94E-08 |
| 6  | 31846234  | 6:31846234   | A | G | 0.2004 | 0.079   | 3.65E-11 |
| 6  | 32303848  | 6:32303848   | A | G | 0.1902 | -0.0929 | 8.25E-13 |
| 6  | 32395036  | 6:32395036   | T | C | 0.7033 | -0.0727 | 8.39E-12 |
| 6  | 32578772  | 6:32578772   | A | C | 0.163  | -0.1676 | 6.96E-28 |
| 6  | 32941506  | 6:32941506   | T | C | 0.0299 | -0.1718 | 1.50E-08 |
| 6  | 72489033  | 6:72489033   | T | C | 0.2844 | 0.0657  | 1.60E-10 |
| 6  | 112243291 | 6:112243291  | A | G | 0.8049 | 0.0714  | 1.84E-09 |
| 6  | 133210361 | 6:133210361  | T | C | 0.9673 | -0.2207 | 1.04E-10 |
| 7  | 23300049  | 7:23300049   | A | C | 0.5939 | 0.1016  | 5.25E-26 |
| 8  | 11712443  | 8:11712443   | A | C | 0.7444 | 0.093   | 3.99E-16 |
| 8  | 16697593  | 8:16697593   | T | G | 0.2682 | -0.0856 | 2.72E-15 |
| 8  | 22525980  | 8:22525980   | T | C | 0.3604 | 0.0556  | 1.16E-08 |
| 8  | 130901909 | 8:130901909  | T | C | 0.7225 | -0.0605 | 1.81E-08 |
| 9  | 17579690  | 9:17579690   | T | G | 0.3422 | -0.0859 | 8.72E-18 |
| 9  | 17724256  | 9:17724256   | A | G | 0.7421 | -0.0905 | 1.66E-17 |
| 9  | 34046391  | 9:34046391   | T | C | 0.7336 | -0.0615 | 6.58E-09 |
| 10 | 15557406  | 10:15557406  | T | C | 0.6892 | 0.0735  | 3.41E-13 |
| 10 | 104015279 | 10:104015279 | A | G | 0.8514 | -0.079  | 1.05E-09 |
| 10 | 121260786 | 10:121260786 | A | G | 0.9855 | -0.3967 | 5.39E-15 |
| 10 | 121361986 | 10:121361986 | T | C | 0.4119 | -0.0557 | 4.27E-09 |
| 10 | 121459087 | 10:121459087 | A | G | 0.5276 | -0.0697 | 1.47E-13 |
| 10 | 121536327 | 10:121536327 | A | G | 0.0166 | 0.4354  | 2.36E-28 |
| 10 | 121667020 | 10:121667020 | T | C | 0.7334 | 0.0658  | 2.45E-09 |
| 10 | 121842595 | 10:121842595 | A | G | 0.0391 | 0.1927  | 1.30E-11 |
| 11 | 10558777  | 11:10558777  | A | G | 0.8776 | 0.087   | 2.12E-09 |
| 11 | 83487277  | 11:83487277  | A | C | 0.4148 | -0.0645 | 2.61E-10 |
| 11 | 133727086 | 11:133727086 | A | C | 0.7324 | 0.0605  | 1.55E-08 |
| 11 | 133787001 | 11:133787001 | T | G | 0.2054 | 0.1073  | 6.26E-20 |
| 12 | 32491673  | 12:32491673  | A | G | 0.9879 | -0.2978 | 2.54E-10 |
| 12 | 33683842  | 12:33683842  | A | G | 0.0159 | 0.3087  | 8.41E-10 |
| 12 | 40349236  | 12:40349236  | A | G | 0.0374 | 0.1589  | 2.84E-09 |
| 12 | 40378773  | 12:40378773  | T | C | 0.2863 | 0.0649  | 5.32E-10 |
| 12 | 40388109  | 12:40388109  | T | C | 0.0257 | 0.3869  | 2.69E-37 |
| 12 | 40437969  | 12:40437969  | A | G | 0.978  | -0.3028 | 1.50E-21 |
| 12 | 40614656  | 12:40614656  | A | G | 0.331  | -0.0878 | 1.91E-18 |
| 12 | 40616414  | 12:40616414  | A | G | 0.9472 | 0.12    | 2.10E-08 |
| 12 | 40617202  | 12:40617202  | T | C | 0.8783 | -0.1276 | 7.75E-20 |
| 12 | 40774678  | 12:40774678  | A | G | 0.0262 | 0.2488  | 6.07E-16 |
| 12 | 40885549  | 12:40885549  | T | C | 0.0219 | 0.4182  | 4.49E-25 |
| 12 | 40989183  | 12:40989183  | A | G | 0.6325 | 0.0558  | 4.23E-08 |
| 12 | 41251554  | 12:41251554  | A | G | 0.9743 | -0.2393 | 4.50E-16 |
| 12 | 46419086  | 12:46419086  | T | C | 0.404  | -0.0539 | 3.96E-08 |
| 12 | 123123414 | 12:123123414 | A | G | 0.2514 | 0.0703  | 1.63E-10 |
| 12 | 123195310 | 12:123195310 | T | C | 0.6175 | 0.0558  | 4.17E-08 |
| 12 | 123326598 | 12:123326598 | T | G | 0.364  | 0.1478  | 1.47E-37 |
| 12 | 123488399 | 12:123488399 | A | C | 0.0214 | 0.2528  | 1.80E-08 |
| 12 | 123656809 | 12:123656809 | A | G | 0.3784 | 0.0612  | 3.23E-10 |
| 12 | 133058157 | 12:133058157 | A | G | 0.5061 | 0.0599  | 1.64E-10 |
| 13 | 49927732  | 13:49927732  | T | C | 0.7397 | 0.0617  | 1.15E-08 |
| 13 | 50296115  | 13:50296115  | T | C | 0.8615 | -0.0972 | 2.24E-08 |

|    |          |             |   |   |        |         |          |
|----|----------|-------------|---|---|--------|---------|----------|
| 13 | 97865021 | 13:97865021 | T | C | 0.2295 | 0.0675  | 1.45E-09 |
| 14 | 37989270 | 14:37989270 | T | C | 0.4376 | -0.0529 | 3.54E-08 |
| 14 | 55348869 | 14:55348869 | T | C | 0.3245 | -0.0842 | 1.66E-16 |
| 14 | 55967795 | 14:55967795 | T | C | 0.3003 | -0.0586 | 4.00E-08 |
| 14 | 56191413 | 14:56191413 | T | C | 0.4408 | -0.0566 | 1.56E-09 |
| 14 | 75373034 | 14:75373034 | A | C | 0.7866 | 0.0707  | 1.92E-09 |
| 14 | 88472612 | 14:88472612 | T | C | 0.4405 | 0.0612  | 5.81E-11 |
| 15 | 61997385 | 15:61997385 | T | C | 0.1417 | -0.1186 | 6.08E-18 |
| 16 | 19279380 | 16:19279380 | T | C | 0.451  | 0.0621  | 3.90E-11 |
| 16 | 28952638 | 16:28952638 | T | C | 0.3062 | -0.0644 | 1.20E-09 |
| 16 | 30977799 | 16:30977799 | A | G | 0.6442 | 0.0907  | 5.12E-20 |
| 16 | 31004169 | 16:31004169 | T | C | 0.7352 | 0.0757  | 4.36E-09 |
| 16 | 50736656 | 16:50736656 | A | G | 0.5985 | 0.0586  | 1.82E-09 |
| 16 | 52636242 | 16:52636242 | A | C | 0.4343 | 0.0668  | 1.29E-12 |
| 16 | 52969426 | 16:52969426 | A | G | 0.0932 | -0.1156 | 1.08E-10 |
| 16 | 52973421 | 16:52973421 | A | G | 0.4608 | -0.056  | 2.82E-08 |
| 17 | 7355621  | 17:7355621  | A | C | 0.6484 | -0.0565 | 1.01E-08 |
| 17 | 40741013 | 17:40741013 | T | C | 0.7349 | 0.0642  | 1.40E-09 |
| 17 | 40782389 | 17:40782389 | T | C | 0.1951 | 0.0686  | 4.43E-08 |
| 17 | 42294462 | 17:42294462 | A | G | 0.6529 | 0.0631  | 5.99E-10 |
| 17 | 42434630 | 17:42434630 | A | G | 0.6056 | -0.071  | 1.29E-11 |
| 17 | 43278576 | 17:43278576 | T | C | 0.3175 | -0.0653 | 6.84E-09 |
| 17 | 43445792 | 17:43445792 | A | G | 0.3388 | -0.0833 | 9.02E-15 |
| 17 | 43472507 | 17:43472507 | A | G | 0.7297 | -0.0806 | 1.63E-13 |
| 17 | 43744203 | 17:43744203 | T | C | 0.1552 | -0.27   | 3.58E-68 |
| 17 | 43798308 | 17:43798308 | A | G | 0.067  | -0.2324 | 6.71E-16 |
| 17 | 43848495 | 17:43848495 | T | G | 0.6364 | -0.0861 | 1.00E-17 |
| 17 | 43935838 | 17:43935838 | T | C | 0.3447 | 0.0975  | 1.51E-19 |
| 17 | 44019712 | 17:44019712 | A | G | 0.3726 | 0.0707  | 2.39E-12 |
| 17 | 44071851 | 17:44071851 | A | G | 0.4078 | -0.1289 | 2.45E-39 |
| 17 | 44141223 | 17:44141223 | T | C | 0.0719 | 0.1529  | 4.98E-08 |
| 17 | 44189067 | 17:44189067 | A | G | 0.6094 | 0.1351  | 1.84E-40 |
| 17 | 44808902 | 17:44808902 | A | G | 0.2311 | -0.2043 | 7.95E-67 |
| 17 | 44852612 | 17:44852612 | A | C | 0.7272 | -0.0962 | 9.03E-14 |
| 17 | 44908263 | 17:44908263 | T | C | 0.6511 | 0.0622  | 3.87E-09 |
| 17 | 59917366 | 17:59917366 | T | C | 0.1641 | 0.082   | 9.28E-10 |
| 17 | 60188441 | 17:60188441 | A | G | 0.1614 | 0.078   | 2.65E-09 |
| 17 | 76419637 | 17:76419637 | T | C | 0.8299 | 0.0759  | 3.12E-09 |
| 18 | 31304318 | 18:31304318 | T | G | 0.4983 | 0.0531  | 1.69E-08 |
| 18 | 40673380 | 18:40673380 | A | G | 0.6816 | -0.0983 | 3.80E-23 |
| 18 | 40852502 | 18:40852502 | A | C | 0.9153 | -0.1071 | 4.73E-10 |
| 18 | 48683589 | 18:48683589 | T | G | 0.5496 | -0.0578 | 1.41E-08 |
| 19 | 2341047  | 19:2341047  | T | C | 0.6937 | -0.0696 | 4.18E-10 |
| 20 | 3164686  | 20:3164686  | T | C | 0.6105 | 0.0622  | 8.45E-11 |
| 20 | 6008226  | 20:6008226  | A | C | 0.8692 | -0.0788 | 7.89E-09 |
| 21 | 38852361 | 21:38852361 | A | G | 0.2828 | 0.0714  | 2.74E-11 |

CHR: Chromosome, BP: Base Pair, A1: Effect allele, A2: Other allele, freq: Frequency, Beta: Beta-coefficient (weight), P: P value.

### Supplementary table 3: SNPs used to calculate the adaptive immunity PD-PRS (NBB)

Description of SNPs, weights and p values used to calculate the adaptive immunity PD-PRS in NBB samples.

| CHR | BP        | SNP         | A1 | A2 | freq   | beta (weight) | P        | gene     |
|-----|-----------|-------------|----|----|--------|---------------|----------|----------|
| 1   | 161617516 | 1:161617516 | A  | G  | 0.8556 | -0.1042       | 2.48E-08 | FCGR2B   |
| 3   | 48962128  | 3:48962128  | T  | G  | 0.3433 | -0.0593       | 2.64E-09 | ARIH2    |
| 3   | 122289005 | 3:122289005 | A  | G  | 0.8323 | -0.0834       | 1.19E-09 | DTX3L    |
| 4   | 15680918  | 4:15680918  | A  | G  | 0.63   | 0.067         | 4.64E-12 | FBXL5    |
| 5   | 134036784 | 5:134036784 | A  | G  | 0.0993 | -0.0916       | 1.51E-08 | SEC24A   |
| 6   | 32371915  | 6:32371915  | T  | C  | 0.2078 | -0.1114       | 9.13E-20 | BTNL2    |
| 6   | 32429594  | 6:32429594  | A  | G  | 0.4296 | 0.0611        | 1.13E-09 | HLA-DRB3 |
| 6   | 32796310  | 6:32796310  | A  | G  | 0.9741 | 0.2022        | 3.86E-09 | TAP2     |
| 6   | 112164313 | 6:112164313 | A  | G  | 0.143  | -0.0802       | 3.25E-09 | FYN      |
| 8   | 11712443  | 8:11712443  | A  | C  | 0.7444 | 0.093         | 3.99E-16 | CTSB     |
| 9   | 17579690  | 9:17579690  | T  | G  | 0.3422 | -0.0859       | 8.72E-18 | SH3GL2   |
| 9   | 17724256  | 9:17724256  | A  | G  | 0.7421 | -0.0905       | 1.66E-17 | SH3GL2   |
| 9   | 33894945  | 9:33894945  | T  | C  | 0.2685 | 0.0595        | 1.56E-08 | UBE2R2   |
| 14  | 75173490  | 14:75173490 | A  | G  | 0.2145 | -0.0675       | 3.47E-08 | AREL1    |
| 16  | 30943096  | 16:30943096 | A  | G  | 0.3488 | -0.0907       | 7.55E-20 | FBXL19   |
| 17  | 43370481  | 17:43370481 | T  | C  | 0.2642 | -0.0786       | 4.36E-13 | MAP3K14  |
| 18  | 48722080  | 18:48722080 | A  | G  | 0.546  | -0.0557       | 2.85E-08 | MEX3C    |

CHR: Chromosome, BP: Base Pair, A1: Effect allele, A2: Other allele, freq: Frequency, Beta: Beta-coefficient (weight), P: P value.

### Supplementary table 4: SNPs used to calculate the alpha synuclein PD-PRS (NBB)

Description of SNPs, weights and p values used to calculate the alpha synuclein PD-PRS in NBB samples.

| CHR | BP        | SNP          | A1 | A2 | freq   | beta (weight) | P         | gene |
|-----|-----------|--------------|----|----|--------|---------------|-----------|------|
| 4   | 90648686  | 4:90648686   | A  | G  | 0.9894 | -0.3031       | 4.22E-08  | SNCA |
| 4   | 90666041  | 4:90666041   | T  | C  | 0.6149 | -0.2504       | 5.16E-149 | SNCA |
| 4   | 90671549  | 4:90671549   | A  | G  | 0.9201 | -0.3213       | 4.36E-77  | SNCA |
| 4   | 90700329  | 4:90700329   | T  | C  | 0.9622 | -0.1696       | 6.22E-10  | SNCA |
| 4   | 90708507  | 4:90708507   | T  | C  | 0.0115 | 0.4472        | 5.71E-20  | SNCA |
| 4   | 90742296  | 4:90742296   | A  | G  | 0.0115 | -0.2565       | 4.16E-08  | SNCA |
| 4   | 90757294  | 4:90757294   | A  | C  | 0.2115 | -0.2042       | 2.21E-68  | SNCA |
| 6   | 112164313 | 6:112164313  | A  | G  | 0.143  | -0.0802       | 3.25E-09  | FYN  |
| 10  | 121178783 | 10:121178783 | T  | C  | 0.0252 | 0.1912        | 4.30E-08  | GRK5 |

CHR: Chromosome, BP: Base Pair, A1: Effect allele, A2: Other allele, freq: Frequency, Beta: Beta-coefficient (weight), P: P value.

### Supplementary table 5: SNPs used to calculate the innate immunity PD-PRS (NBB)

Description of SNPs, weights and p values used to calculate the innate immunity PD-PRS in NBB samples.

| CHR | BP        | SNP         | A1 | A2 | freq   | beta (weight) | P        | gene    |
|-----|-----------|-------------|----|----|--------|---------------|----------|---------|
| 1   | 161478859 | 1:161478859 | T  | C  | 0.4948 | -0.0643       | 8.03E-12 | FCGR2A  |
| 3   | 48719638  | 3:48719638  | T  | C  | 0.3562 | -0.0603       | 1.55E-08 | NCKIPSD |
| 4   | 15728176  | 4:15728176  | A  | G  | 0.0308 | -0.1919       | 9.25E-11 | BST1    |
| 4   | 15737348  | 4:15737348  | A  | G  | 0.5529 | 0.1035        | 2.06E-28 | BST1    |
| 6   | 31881731  | 6:31881731  | A  | G  | 0.6614 | -0.065        | 3.64E-10 | C2      |
| 6   | 112164313 | 6:112164313 | A  | G  | 0.143  | -0.0802       | 3.25E-09 | FYN     |
| 8   | 11712443  | 8:11712443  | A  | C  | 0.7444 | 0.093         | 3.99E-16 | CTSB    |
| 16  | 50736656  | 16:50736656 | A  | G  | 0.5985 | 0.0586        | 1.82E-09 | NOD2    |
| 17  | 42430244  | 17:42430244 | T  | C  | 0.293  | 0.0672        | 1.20E-08 | GRN     |
| 17  | 43370481  | 17:43370481 | T  | C  | 0.2642 | -0.0786       | 4.36E-13 | MAP3K14 |

CHR: Chromosome, BP: Base Pair, A1: Effect allele, A2: Other allele, freq: Frequency, Beta: Beta-coefficient (weight), P: P value.

### Supplementary table 6: SNPs used to calculate the lysosomal PD-PRS (NBB)

Description of SNPs, weights and p values used to calculate the innate lysosomal PD-PRS in NBB samples.

| CHR | BP        | SNP          | A1 | A2 | freq   | beta (weight) | P        | gene   |
|-----|-----------|--------------|----|----|--------|---------------|----------|--------|
| 1   | 155205378 | 1:155205378  | T  | C  | 0.0161 | 0.6506        | 3.72E-48 | GBA    |
| 3   | 182851513 | 3:182851513  | A  | G  | 0.8726 | 0.1252        | 1.48E-18 | LAMP3  |
| 3   | 182867869 | 3:182867869  | A  | G  | 0.8314 | 0.073         | 6.15E-09 | LAMP3  |
| 4   | 980896    | 4:980896     | A  | C  | 0.4209 | -0.115        | 4.09E-29 | IDUA   |
| 4   | 982345    | 4:982345     | T  | C  | 0.0237 | 0.2103        | 2.88E-09 | IDUA   |
| 4   | 989022    | 4:989022     | A  | G  | 0.8773 | -0.1646       | 4.64E-24 | IDUA   |
| 4   | 77111032  | 4:77111032   | T  | C  | 0.3099 | -0.0624       | 9.53E-10 | SCARB2 |
| 4   | 77134786  | 4:77134786   | T  | C  | 0.3451 | 0.0747        | 3.39E-14 | SCARB2 |
| 8   | 11712443  | 8:11712443   | A  | C  | 0.7444 | 0.093         | 3.99E-16 | CTSB   |
| 12  | 123424071 | 12:123424071 | A  | G  | 0.5862 | -0.0706       | 2.75E-13 | ABCB9  |
| 12  | 123457143 | 12:123457143 | T  | C  | 0.022  | 0.2479        | 2.39E-08 | ABCB9  |
| 14  | 88410811  | 14:88410811  | A  | C  | 0.6258 | -0.0614       | 2.62E-10 | GALC   |

CHR: Chromosome, BP: Base Pair, A1: Effect allele, A2: Other allele, freq: Frequency, Beta: Beta-coefficient (weight), P: P value.

### Supplementary table 7: SNPs used to calculate the lysosomal PD-PRS excluding GBA (NBB)

Description of SNPs, weights and p values used to calculate the lysosomal PD-PRS excluding GBA in NBB samples.

| CHR | BP        | SNP          | A1 | A2 | freq   | beta (weight) | P        | gene   |
|-----|-----------|--------------|----|----|--------|---------------|----------|--------|
| 3   | 182851513 | 3:182851513  | A  | G  | 0.8726 | 0.1252        | 1.48E-18 | LAMP3  |
| 3   | 182867869 | 3:182867869  | A  | G  | 0.8314 | 0.073         | 6.15E-09 | LAMP3  |
| 4   | 980896    | 4:980896     | A  | C  | 0.4209 | -0.115        | 4.09E-29 | IDUA   |
| 4   | 982345    | 4:982345     | T  | C  | 0.0237 | 0.2103        | 2.88E-09 | IDUA   |
| 4   | 989022    | 4:989022     | A  | G  | 0.8773 | -0.1646       | 4.64E-24 | IDUA   |
| 4   | 77111032  | 4:77111032   | T  | C  | 0.3099 | -0.0624       | 9.53E-10 | SCARB2 |
| 4   | 77134786  | 4:77134786   | T  | C  | 0.3451 | 0.0747        | 3.39E-14 | SCARB2 |
| 8   | 11712443  | 8:11712443   | A  | C  | 0.7444 | 0.093         | 3.99E-16 | CTSB   |
| 12  | 123424071 | 12:123424071 | A  | G  | 0.5862 | -0.0706       | 2.75E-13 | ABCB9  |
| 12  | 123457143 | 12:123457143 | T  | C  | 0.022  | 0.2479        | 2.39E-08 | ABCB9  |
| 14  | 88410811  | 14:88410811  | A  | C  | 0.6258 | -0.0614       | 2.62E-10 | GALC   |

CHR: Chromosome, BP: Base Pair, A1: Effect allele, A2: Other allele, freq: Frequency, Beta: Beta-coefficient (weight), P: P value.

### Supplementary table 8: SNPs used to calculate the endocytic membrane trafficking PD-PRS (NBB)

Description of SNPs, weights and p values used to calculate the endocytic membrane trafficking PD-PRS in NBB samples.

| CHR | BP        | SNP          | A1 | A2 | freq   | beta (weight) | P        | gene    |
|-----|-----------|--------------|----|----|--------|---------------|----------|---------|
| 1   | 171673236 | 1:171673236  | A  | G  | 0.1957 | -0.0697       | 6.53E-09 | VAMP4   |
| 4   | 863579    | 4:863579     | A  | G  | 0.9692 | -0.2063       | 6.65E-09 | GAK     |
| 4   | 893712    | 4:893712     | T  | C  | 0.161  | 0.1142        | 1.02E-18 | GAK     |
| 4   | 906903    | 4:906903     | T  | C  | 0.1158 | 0.1681        | 2.22E-30 | GAK     |
| 4   | 925149    | 4:925149     | T  | C  | 0.6308 | 0.1074        | 1.36E-27 | GAK     |
| 9   | 17579690  | 9:17579690   | T  | G  | 0.3422 | -0.0859       | 8.72E-18 | SH3GL2  |
| 9   | 17724256  | 9:17724256   | A  | G  | 0.7421 | -0.0905       | 1.66E-17 | SH3GL2  |
| 12  | 123379193 | 12:123379193 | T  | C  | 0.2984 | -0.0828       | 4.22E-09 | VPS37B  |
| 17  | 43565690  | 17:43565690  | T  | C  | 0.7804 | -0.0869       | 2.39E-08 | PLEKHM1 |
| 18  | 40852502  | 18:40852502  | A  | C  | 0.9153 | -0.1071       | 4.73E-10 | SYT4    |

CHR: Chromosome, BP: Base Pair, A1: Effect allele, A2: Other allele, freq: Frequency, Beta: Beta-coefficient (weight), P: P value.

### Supplementary table 9: SNPs used to calculate the mitochondria PD-PRS (NBB)

Description of SNPs, weights and p values used to calculate the mitochondria PD-PRS in NBB samples.

| CHR | BP        | SNP          | A1 | A2 | freq   | beta (weight) | P        | gene  |
|-----|-----------|--------------|----|----|--------|---------------|----------|-------|
| 12  | 123424071 | 12:123424071 | A  | G  | 0.5862 | -0.0706       | 2.75E-13 | ABCB9 |
| 16  | 31121793  | 16:31121793  | A  | G  | 0.3853 | 0.0743        | 1.49E-14 | BCKDK |

CHR: Chromosome, BP: Base Pair, A1: Effect allele, A2: Other allele, freq: Frequency, Beta: Beta-coefficient (weight), P: P value.

**Supplementary table 10: SNPs used to calculate the microglia PD-PRS (NBB)**  
Description of SNPs, weights and p values used to calculate the microglia PD-PRS in NBB samples.

| CHR | BP        | SNP          | A1 | A2 | freq   | beta (weight) | P        |
|-----|-----------|--------------|----|----|--------|---------------|----------|
| 1   | 155108167 | 1:155108167  | A  | G  | 0.0174 | 0.6343        | 1.68E-54 |
| 1   | 171711152 | 1:171711152  | A  | C  | 0.8055 | 0.0674        | 1.32E-08 |
| 1   | 205719532 | 1:205719532  | A  | G  | 0.5657 | 0.1063        | 1.14E-29 |
| 1   | 226912135 | 1:226912135  | A  | G  | 0.385  | -0.0581       | 1.63E-09 |
| 2   | 102389681 | 2:102389681  | A  | G  | 0.6653 | -0.0683       | 3.57E-12 |
| 2   | 135464616 | 2:135464616  | A  | G  | 0.7185 | 0.0807        | 4.55E-14 |
| 2   | 169067946 | 2:169067946  | T  | C  | 0.1663 | 0.0789        | 3.60E-10 |
| 3   | 18199602  | 3:18199602   | A  | G  | 0.9707 | -0.1919       | 3.68E-10 |
| 3   | 49045355  | 3:49045355   | T  | C  | 0.3416 | -0.059        | 4.10E-09 |
| 3   | 122135255 | 3:122135255  | T  | G  | 0.8378 | -0.0848       | 2.70E-11 |
| 3   | 151109711 | 3:151109711  | A  | G  | 0.6324 | 0.0624        | 1.47E-10 |
| 3   | 161051793 | 3:161051793  | A  | G  | 0.3223 | 0.0573        | 8.36E-09 |
| 3   | 182803656 | 3:182803656  | T  | C  | 0.1341 | -0.138        | 4.37E-23 |
| 4   | 980896    | 4:980896     | A  | C  | 0.4209 | -0.115        | 4.09E-29 |
| 4   | 18024121  | 4:18024121   | T  | C  | 0.1622 | -0.0813       | 9.64E-10 |
| 4   | 77140733  | 4:77140733   | T  | C  | 0.4107 | 0.0779        | 1.76E-16 |
| 4   | 77420822  | 4:77420822   | A  | C  | 0.4815 | -0.052        | 3.13E-08 |
| 4   | 90750844  | 4:90750844   | T  | C  | 0.7933 | 0.1909        | 3.41E-39 |
| 4   | 90810807  | 4:90810807   | T  | C  | 0.0431 | 0.2917        | 2.09E-38 |
| 4   | 114369065 | 4:114369065  | T  | C  | 0.1744 | 0.0875        | 9.82E-13 |
| 5   | 59930164  | 5:59930164   | A  | C  | 0.068  | 0.1369        | 1.22E-13 |
| 5   | 60240986  | 5:60240986   | A  | G  | 0.3591 | 0.0644        | 1.20E-10 |
| 5   | 133922901 | 5:133922901  | T  | C  | 0.8881 | 0.0826        | 4.39E-08 |
| 6   | 27722064  | 6:27722064   | T  | C  | 0.7631 | -0.0712       | 9.38E-11 |
| 6   | 31707730  | 6:31707730   | T  | C  | 0.0671 | 0.12          | 2.54E-09 |
| 6   | 32294992  | 6:32294992   | A  | G  | 0.4063 | -0.0558       | 2.82E-08 |
| 6   | 32577715  | 6:32577715   | T  | G  | 0.7211 | -0.0722       | 2.00E-09 |
| 6   | 32577973  | 6:32577973   | T  | G  | 0.8406 | 0.1637        | 9.19E-28 |
| 7   | 23245569  | 7:23245569   | A  | G  | 0.6077 | 0.1025        | 1.15E-25 |
| 8   | 11702375  | 8:11702375   | A  | G  | 0.2595 | -0.0879       | 1.89E-15 |
| 8   | 16716926  | 8:16716926   | T  | G  | 0.7304 | 0.0791        | 1.06E-13 |
| 10  | 121410917 | 10:121410917 | T  | C  | 0.0175 | 0.4152        | 3.27E-21 |
| 10  | 121484999 | 10:121484999 | A  | G  | 0.4088 | 0.0586        | 5.58E-10 |
| 12  | 40500195  | 12:40500195  | A  | C  | 0.0236 | 0.185         | 1.46E-09 |
| 12  | 40602765  | 12:40602765  | T  | C  | 0.0716 | 0.1403        | 2.00E-15 |
| 14  | 55348869  | 14:55348869  | T  | C  | 0.3245 | -0.0842       | 1.66E-16 |
| 14  | 75359730  | 14:75359730  | T  | C  | 0.133  | -0.082        | 1.34E-08 |
| 14  | 88472612  | 14:88472612  | T  | C  | 0.4405 | 0.0612        | 5.81E-11 |
| 16  | 30934075  | 16:30934075  | A  | G  | 0.6531 | 0.09          | 1.47E-19 |
| 16  | 50715185  | 16:50715185  | A  | G  | 0.4306 | -0.0577       | 6.01E-09 |
| 17  | 40706273  | 17:40706273  | A  | C  | 0.2709 | -0.0632       | 8.79E-09 |
| 17  | 44270181  | 17:44270181  | A  | G  | 0.4131 | 0.097         | 1.32E-15 |
| 17  | 60142898  | 17:60142898  | A  | G  | 0.1622 | 0.0756        | 3.77E-09 |
| 18  | 48724724  | 18:48724724  | T  | C  | 0.4525 | 0.0556        | 3.00E-08 |
| 20  | 5986950   | 20:5986950   | A  | G  | 0.1307 | 0.0765        | 2.89E-08 |

CHR: Chromosome, BP: Base Pair, A1: Effect allele, A2: Other allele, freq: Frequency, Beta: Beta-coefficient (weight), P: P value.



**Supplementary table 11: SNPs used to calculate the monocytes PD-PRS (NBB)**  
 Description of SNPs, weights and p values used to calculate the monocytes PD-PRS in NBB samples.

| CHR | BP        | SNP          | A1 | A2 | freq   | beta (weight) | P        |
|-----|-----------|--------------|----|----|--------|---------------|----------|
| 1   | 155074903 | 1:155074903  | T  | G  | 0.4902 | -0.0516       | 4.27E-08 |
| 1   | 155108167 | 1:155108167  | A  | G  | 0.0174 | 0.6343        | 1.68E-54 |
| 1   | 171711152 | 1:171711152  | A  | C  | 0.8055 | 0.0674        | 1.32E-08 |
| 1   | 205719532 | 1:205719532  | A  | G  | 0.5657 | 0.1063        | 1.14E-29 |
| 2   | 102353345 | 2:102353345  | T  | G  | 0.6669 | -0.0671       | 9.79E-12 |
| 2   | 135516504 | 2:135516504  | A  | G  | 0.8381 | 0.0745        | 1.90E-08 |
| 2   | 169067946 | 2:169067946  | T  | C  | 0.1663 | 0.0789        | 3.60E-10 |
| 3   | 48779715  | 3:48779715   | T  | C  | 0.6566 | 0.0589        | 3.76E-09 |
| 3   | 49045355  | 3:49045355   | T  | C  | 0.3416 | -0.059        | 4.10E-09 |
| 3   | 122135255 | 3:122135255  | T  | G  | 0.8378 | -0.0848       | 2.70E-11 |
| 3   | 182880480 | 3:182880480  | A  | G  | 0.9158 | 0.0988        | 3.32E-08 |
| 4   | 980896    | 4:980896     | A  | C  | 0.4209 | -0.115        | 4.09E-29 |
| 4   | 15685051  | 4:15685051   | T  | C  | 0.5986 | 0.0647        | 1.03E-11 |
| 4   | 15758235  | 4:15758235   | T  | C  | 0.794  | 0.1           | 3.93E-17 |
| 4   | 15810779  | 4:15810779   | T  | G  | 0.0448 | -0.1551       | 4.05E-11 |
| 4   | 18024121  | 4:18024121   | T  | C  | 0.1622 | -0.0813       | 9.64E-10 |
| 4   | 77134786  | 4:77134786   | T  | C  | 0.3451 | 0.0747        | 3.39E-14 |
| 4   | 90750844  | 4:90750844   | T  | C  | 0.7933 | 0.1909        | 3.41E-39 |
| 5   | 59995742  | 5:59995742   | A  | C  | 0.0701 | 0.1315        | 3.57E-13 |
| 6   | 31707730  | 6:31707730   | T  | C  | 0.0671 | 0.12          | 2.54E-09 |
| 6   | 32405192  | 6:32405192   | T  | G  | 0.3314 | 0.0558        | 4.61E-08 |
| 6   | 32577715  | 6:32577715   | T  | G  | 0.7211 | -0.0722       | 2.00E-09 |
| 6   | 32577973  | 6:32577973   | T  | G  | 0.8406 | 0.1637        | 9.19E-28 |
| 6   | 112261489 | 6:112261489  | T  | C  | 0.8552 | 0.0786        | 5.51E-09 |
| 7   | 23221870  | 7:23221870   | T  | C  | 0.6082 | 0.1007        | 4.36E-25 |
| 8   | 11660051  | 8:11660051   | A  | G  | 0.251  | -0.0778       | 7.72E-12 |
| 8   | 11681825  | 8:11681825   | T  | C  | 0.4341 | 0.0582        | 8.65E-10 |
| 8   | 11714941  | 8:11714941   | T  | G  | 0.8588 | 0.0797        | 2.13E-08 |
| 8   | 22457388  | 8:22457388   | A  | G  | 0.3342 | 0.0543        | 4.90E-08 |
| 9   | 33818257  | 9:33818257   | T  | C  | 0.7346 | -0.0604       | 2.59E-08 |
| 10  | 104005410 | 10:104005410 | T  | C  | 0.8543 | -0.0795       | 1.24E-09 |
| 10  | 121410917 | 10:121410917 | T  | C  | 0.0175 | 0.4152        | 3.27E-21 |
| 12  | 40602765  | 12:40602765  | T  | C  | 0.0716 | 0.1403        | 2.00E-15 |
| 12  | 40616414  | 12:40616414  | A  | G  | 0.9472 | 0.12          | 2.10E-08 |
| 12  | 40620815  | 12:40620815  | A  | G  | 0.6716 | 0.0871        | 1.53E-12 |
| 12  | 40620881  | 12:40620881  | T  | C  | 0.0334 | 0.2103        | 1.34E-10 |
| 14  | 88472612  | 14:88472612  | T  | C  | 0.4405 | 0.0612        | 5.81E-11 |
| 16  | 30934075  | 16:30934075  | A  | G  | 0.6531 | 0.09          | 1.47E-19 |
| 16  | 50715185  | 16:50715185  | A  | G  | 0.4306 | -0.0577       | 6.01E-09 |
| 17  | 44270181  | 17:44270181  | A  | G  | 0.4131 | 0.097         | 1.32E-15 |
| 17  | 60142898  | 17:60142898  | A  | G  | 0.1622 | 0.0756        | 3.77E-09 |
| 17  | 76413476  | 17:76413476  | T  | C  | 0.1711 | -0.0735       | 2.06E-08 |
| 18  | 48724724  | 18:48724724  | T  | C  | 0.4525 | 0.0556        | 3.00E-08 |
| 20  | 5986950   | 20:5986950   | A  | G  | 0.1307 | 0.0765        | 2.89E-08 |

CHR: Chromosome, BP: Base Pair, A1: Effect allele, A2: Other allele, freq: Frequency, Beta: Beta-coefficient (weight), P: P value.

**Supplementary table 12: SNPs used to calculate the AD-PRS (NBB)**  
Description of SNPs, weights and p values used to calculate the AD-PRS in NBB samples.

| CHR | BP        | SNP          | A1 | A2 | freq       | beta (weight) | P         |
|-----|-----------|--------------|----|----|------------|---------------|-----------|
| 1   | 161155392 | 1:161155392  | A  | G  | 0.228026   | 0.016411633   | 1.90E-10  |
| 1   | 207750568 | 1:207750568  | T  | C  | 0.171481   | 0.025417699   | 6.83E-19  |
| 2   | 127891427 | 2:127891427  | C  | A  | 0.411349   | 0.031095063   | 1.45E-44  |
| 2   | 234069512 | 2:234069512  | C  | A  | 0.466846   | 0.012969003   | 2.50E-09  |
| 4   | 11026028  | 4:11026028   | A  | G  | 0.262473   | 0.014704637   | 1.98E-09  |
| 6   | 32415153  | 6:32415153   | T  | C  | 0.165368   | 0.018782338   | 9.91E-11  |
| 6   | 32571122  | 6:32571122   | T  | C  | 0.13012    | -0.020827485  | 8.55E-11  |
| 6   | 32572082  | 6:32572082   | C  | T  | 0.431906   | 0.012420404   | 2.09E-08  |
| 6   | 41129207  | 6:41129207   | T  | C  | 0.00746843 | 0.073707877   | 3.02E-08  |
| 6   | 47432637  | 6:47432637   | C  | T  | 0.355744   | 0.0144515     | 1.99E-10  |
| 7   | 99785750  | 7:99785750   | T  | C  | 0.153295   | 0.016803856   | 3.29E-08  |
| 7   | 99971834  | 7:99971834   | A  | G  | 0.32433    | -0.018395737  | 1.80E-15  |
| 7   | 143108158 | 7:143108158  | T  | C  | 0.485387   | -0.01451867   | 2.89E-11  |
| 8   | 27195121  | 8:27195121   | C  | T  | 0.365676   | 0.015322448   | 8.49E-12  |
| 8   | 27322974  | 8:27322974   | A  | G  | 0.0860179  | -0.022969232  | 2.79E-09  |
| 8   | 27464929  | 8:27464929   | A  | G  | 0.377826   | -0.020161433  | 1.48E-19  |
| 8   | 27494366  | 8:27494366   | C  | T  | 0.0339544  | -0.032869537  | 3.59E-08  |
| 10  | 11717397  | 10:11717397  | C  | T  | 0.360964   | 0.012943374   | 1.04E-08  |
| 11  | 59958380  | 11:59958380  | A  | C  | 0.382122   | -0.017870026  | 1.11E-15  |
| 11  | 85776544  | 11:85776544  | G  | A  | 0.317416   | -0.020428916  | 1.48E-18  |
| 11  | 121435587 | 11:121435587 | C  | T  | 0.0440715  | -0.035926385  | 8.12E-12  |
| 14  | 92938855  | 14:92938855  | A  | G  | 0.33648    | -0.014826611  | 1.32E-10  |
| 15  | 59022615  | 15:59022615  | C  | T  | 0.354342   | -0.013721107  | 1.22E-09  |
| 15  | 63569902  | 15:63569902  | T  | C  | 0.124823   | 0.01802674    | 3.44E-08  |
| 16  | 31133100  | 16:31133100  | A  | G  | 0.298476   | -0.012985226  | 3.73E-08  |
| 17  | 5138980   | 17:5138980   | A  | G  | 0.126086   | 0.019985799   | 7.91E-10  |
| 17  | 47450775  | 17:47450775  | A  | G  | 0.453265   | 0.01230151    | 1.68E-08  |
| 18  | 56189459  | 18:56189459  | C  | T  | 0.0111949  | 0.0567967     | 3.38E-08  |
| 19  | 1043638   | 19:1043638   | T  | C  | 0.247644   | 0.015923035   | 2.38E-10  |
| 19  | 45020859  | 19:45020859  | A  | G  | 0.0308747  | 0.044234873   | 1.28E-12  |
| 19  | 45048858  | 19:45048858  | A  | G  | 0.0326609  | 0.045591355   | 1.49E-12  |
| 19  | 45078886  | 19:45078886  | G  | A  | 0.370126   | -0.017057993  | 3.36E-14  |
| 19  | 45125218  | 19:45125218  | C  | T  | 0.266261   | 0.014992131   | 9.81E-10  |
| 19  | 45137322  | 19:45137322  | C  | T  | 0.00782261 | 0.087405371   | 1.98E-11  |
| 19  | 45152394  | 19:45152394  | C  | T  | 0.284078   | -0.019942754  | 7.68E-17  |
| 19  | 45196964  | 19:45196964  | A  | G  | 0.0128734  | -0.062843126  | 7.05E-10  |
| 19  | 45198477  | 19:45198477  | T  | C  | 0.0407607  | -0.034570888  | 2.63E-10  |
| 19  | 45202052  | 19:45202052  | T  | C  | 0.364998   | -0.016713326  | 8.52E-14  |
| 19  | 45231821  | 19:45231821  | A  | G  | 0.0857099  | -0.037473406  | 2.65E-22  |
| 19  | 45233503  | 19:45233503  | T  | G  | 0.0115029  | 0.071164404   | 4.45E-11  |
| 19  | 45240584  | 19:45240584  | C  | T  | 0.12624    | 0.04628154    | 7.37E-45  |
| 19  | 45251156  | 19:45251156  | C  | A  | 0.413998   | -0.035063874  | 9.24E-58  |
| 19  | 45302951  | 19:45302951  | G  | A  | 0.128149   | -0.033533096  | 4.32E-25  |
| 19  | 45324138  | 19:45324138  | A  | G  | 0.291346   | 0.060741893   | 1.08E-144 |
| 19  | 45331994  | 19:45331994  | A  | G  | 0.237527   | -0.02237755   | 1.11E-18  |
| 19  | 45343579  | 19:45343579  | A  | G  | 0.120172   | -0.029036799  | 2.95E-18  |
| 19  | 45357939  | 19:45357939  | A  | G  | 0.481337   | -0.093037189  | 1.35E-69  |
| 19  | 45360488  | 19:45360488  | G  | T  | 0.00950108 | 0.165797318   | 9.62E-45  |
| 19  | 45363820  | 19:45363820  | G  | T  | 0.00680628 | 0.225470931   | 6.45E-66  |
| 19  | 45370941  | 19:45370941  | T  | C  | 0.0343086  | -0.047431249  | 1.83E-15  |

|    |          |             |   |   |           |              |           |
|----|----------|-------------|---|---|-----------|--------------|-----------|
| 19 | 45378719 | 19:45378719 | T | C | 0.055867  | -0.042842615 | 7.63E-20  |
| 19 | 45382717 | 19:45382717 | G | A | 0.396212  | 0.043738423  | 4.03E-86  |
| 19 | 45384931 | 19:45384931 | A | G | 0.0100554 | 0.195491888  | 7.98E-65  |
| 19 | 45387596 | 19:45387596 | A | G | 0.129489  | 0.165266132  | 0         |
| 19 | 45395266 | 19:45395266 | G | A | 0.376763  | -0.070610622 | 1.88E-221 |
| 19 | 45403924 | 19:45403924 | T | C | 0.052279  | -0.045356269 | 8.87E-21  |
| 19 | 45405499 | 19:45405499 | A | G | 0.0223899 | -0.046348902 | 2.11E-10  |
| 19 | 45412079 | 19:45412079 | T | C | 0.0721435 | -0.088453729 | 4.73E-100 |
| 19 | 45412955 | 19:45412955 | C | A | 0.0260548 | 0.220257934  | 1.16E-232 |
| 19 | 45421100 | 19:45421100 | A | G | 0.414891  | -0.127218135 | 2.09E-125 |
| 19 | 45431403 | 19:45431403 | T | C | 0.0305051 | -0.03874658  | 6.44E-10  |
| 19 | 45461996 | 19:45461996 | G | A | 0.0536495 | -0.031183381 | 8.07E-11  |
| 19 | 45463386 | 19:45463386 | A | G | 0.0091777 | 0.171677454  | 3.96E-50  |
| 19 | 45477111 | 19:45477111 | T | C | 0.234447  | -0.014806885 | 6.24E-09  |
| 19 | 45490192 | 19:45490192 | G | A | 0.34053   | 0.02297834   | 7.25E-24  |
| 19 | 45491032 | 19:45491032 | T | C | 0.0123037 | -0.057649908 | 3.18E-08  |
| 19 | 45543755 | 19:45543755 | G | A | 0.0276101 | 0.058144769  | 8.95E-17  |
| 19 | 45549135 | 19:45549135 | A | G | 0.0213582 | 0.06874778   | 8.66E-18  |
| 19 | 45552587 | 19:45552587 | C | T | 0.010656  | 0.085265371  | 2.62E-14  |
| 19 | 45580372 | 19:45580372 | T | C | 0.041546  | 0.042832376  | 2.25E-15  |
| 19 | 45592475 | 19:45592475 | T | C | 0.113258  | -0.019445276 | 1.22E-08  |
| 19 | 45655333 | 19:45655333 | C | T | 0.10154   | 0.046612785  | 1.07E-38  |
| 19 | 45657486 | 19:45657486 | C | T | 0.488328  | -0.012558924 | 5.82E-09  |
| 19 | 45708408 | 19:45708408 | C | T | 0.177087  | 0.028203502  | 4.65E-23  |
| 19 | 45712679 | 19:45712679 | A | G | 0.0170465 | 0.079489896  | 1.57E-21  |
| 19 | 45722743 | 19:45722743 | A | G | 0.0405143 | 0.032350982  | 2.57E-08  |
| 19 | 45729123 | 19:45729123 | C | T | 0.0567755 | 0.033465391  | 7.60E-13  |
| 19 | 45734751 | 19:45734751 | G | A | 0.389128  | -0.016143004 | 4.49E-13  |
| 19 | 45830947 | 19:45830947 | A | G | 0.392116  | -0.012247909 | 3.21E-08  |
| 19 | 51727962 | 19:51727962 | A | C | 0.299276  | -0.013757048 | 5.15E-09  |
| 20 | 54998544 | 20:54998544 | G | A | 0.0950416 | -0.022894258 | 5.38E-10  |

CHR: Chromosome, BP: Base Pair, A1: Effect allele, A2: Other allele, freq: Frequency, Beta: Beta-coefficient (weight), P: P value.

### Supplementary table 13: SNPs used to calculate the AD-PRS excluding APOE (NBB)

Description of SNPs, weights and p values used to calculate the AD-PRS excluding APOE in NBB samples.

| CHR | BP        | SNP         | A1 | A2 | freq       | beta (weight) | P        |
|-----|-----------|-------------|----|----|------------|---------------|----------|
| 1   | 161155392 | 1:161155392 | A  | G  | 0.228026   | 0.016411633   | 1.90E-10 |
| 1   | 207750568 | 1:207750568 | T  | C  | 0.171481   | 0.025417699   | 6.83E-19 |
| 2   | 127891427 | 2:127891427 | C  | A  | 0.411349   | 0.031095063   | 1.45E-44 |
| 2   | 234069512 | 2:234069512 | C  | A  | 0.466846   | 0.012969003   | 2.50E-09 |
| 4   | 11026028  | 4:11026028  | A  | G  | 0.262473   | 0.014704637   | 1.98E-09 |
| 6   | 32415153  | 6:32415153  | T  | C  | 0.165368   | 0.018782338   | 9.91E-11 |
| 6   | 32571122  | 6:32571122  | T  | C  | 0.13012    | -0.020827485  | 8.55E-11 |
| 6   | 32572082  | 6:32572082  | C  | T  | 0.431906   | 0.012420404   | 2.09E-08 |
| 6   | 41129207  | 6:41129207  | T  | C  | 0.00746843 | 0.073707877   | 3.02E-08 |
| 6   | 47432637  | 6:47432637  | C  | T  | 0.355744   | 0.0144515     | 1.99E-10 |
| 7   | 99785750  | 7:99785750  | T  | C  | 0.153295   | 0.016803856   | 3.29E-08 |
| 7   | 99971834  | 7:99971834  | A  | G  | 0.32433    | -0.018395737  | 1.80E-15 |
| 7   | 143108158 | 7:143108158 | T  | C  | 0.485387   | -0.01451867   | 2.89E-11 |

|    |           |              |   |   |           |              |          |
|----|-----------|--------------|---|---|-----------|--------------|----------|
| 8  | 27195121  | 8:27195121   | C | T | 0.365676  | 0.015322448  | 8.49E-12 |
| 8  | 27322974  | 8:27322974   | A | G | 0.0860179 | -0.022969232 | 2.79E-09 |
| 8  | 27464929  | 8:27464929   | A | G | 0.377826  | -0.020161433 | 1.48E-19 |
| 8  | 27494366  | 8:27494366   | C | T | 0.0339544 | -0.032869537 | 3.59E-08 |
| 10 | 11717397  | 10:11717397  | C | T | 0.360964  | 0.012943374  | 1.04E-08 |
| 11 | 59958380  | 11:59958380  | A | C | 0.382122  | -0.017870026 | 1.11E-15 |
| 11 | 85776544  | 11:85776544  | G | A | 0.317416  | -0.020428916 | 1.48E-18 |
| 11 | 121435587 | 11:121435587 | C | T | 0.0440715 | -0.035926385 | 8.12E-12 |
| 14 | 92938855  | 14:92938855  | A | G | 0.33648   | -0.014826611 | 1.32E-10 |
| 15 | 59022615  | 15:59022615  | C | T | 0.354342  | -0.013721107 | 1.22E-09 |
| 15 | 63569902  | 15:63569902  | T | C | 0.124823  | 0.01802674   | 3.44E-08 |
| 16 | 31133100  | 16:31133100  | A | G | 0.298476  | -0.012985226 | 3.73E-08 |
| 17 | 5138980   | 17:5138980   | A | G | 0.126086  | 0.019985799  | 7.91E-10 |
| 17 | 47450775  | 17:47450775  | A | G | 0.453265  | 0.01230151   | 1.68E-08 |
| 18 | 56189459  | 18:56189459  | C | T | 0.0111949 | 0.0567967    | 3.38E-08 |
| 19 | 1043638   | 19:1043638   | T | C | 0.247644  | 0.015923035  | 2.38E-10 |
| 19 | 45020859  | 19:45020859  | A | G | 0.0308747 | 0.044234873  | 1.28E-12 |
| 19 | 45048858  | 19:45048858  | A | G | 0.0326609 | 0.045591355  | 1.49E-12 |
| 19 | 45078886  | 19:45078886  | G | A | 0.370126  | -0.017057993 | 3.36E-14 |
| 19 | 51727962  | 19:51727962  | A | C | 0.299276  | -0.013757048 | 5.15E-09 |
| 20 | 54998544  | 20:54998544  | G | A | 0.0950416 | -0.022894258 | 5.38E-10 |

CHR: Chromosome, BP: Base Pair, A1: Effect allele, A2: Other allele, freq: Frequency, Beta: Beta-coefficient (weight), P: P value.

### Supplementary table I4: SNPs used to calculate the PD-PRS (Mayo Clinic)

Description of SNPs, weights and p values used to calculate the PD-PRS in the Mayo Clinic samples.

| CHR | BP        | SNP         | A1 | A2 | freq   | beta (weight) | P        |
|-----|-----------|-------------|----|----|--------|---------------|----------|
| 1   | 155014968 | 1:155014968 | T  | G  | 0.9864 | -0.2715       | 1.33E-08 |
| 1   | 155033317 | 1:155033317 | T  | C  | 0.3189 | 0.0724        | 7.92E-13 |
| 1   | 155135036 | 1:155135036 | A  | G  | 0.0169 | 0.6068        | 1.72E-70 |
| 1   | 155685477 | 1:155685477 | A  | G  | 0.9082 | -0.1133       | 2.09E-09 |
| 1   | 156007988 | 1:156007988 | A  | G  | 0.0192 | 0.4784        | 2.87E-39 |
| 1   | 156300731 | 1:156300731 | T  | C  | 0.9828 | -0.3482       | 1.06E-10 |
| 1   | 161478859 | 1:161478859 | T  | C  | 0.4948 | -0.0643       | 8.03E-12 |
| 1   | 161617516 | 1:161617516 | A  | G  | 0.8556 | -0.1042       | 2.48E-08 |
| 1   | 171719769 | 1:171719769 | T  | C  | 0.1949 | -0.0704       | 4.47E-09 |
| 1   | 205642390 | 1:205642390 | T  | C  | 0.182  | 0.0886        | 6.08E-13 |
| 1   | 205723572 | 1:205723572 | T  | C  | 0.566  | 0.1066        | 1.11E-29 |
| 1   | 205723619 | 1:205723619 | A  | C  | 0.0503 | -0.1369       | 7.64E-10 |
| 1   | 226916078 | 1:226916078 | T  | C  | 0.7196 | 0.0833        | 1.38E-15 |
| 1   | 226983330 | 1:226983330 | T  | C  | 0.7796 | -0.0794       | 1.21E-11 |
| 1   | 232669682 | 1:232669682 | T  | G  | 0.1418 | 0.1113        | 4.94E-17 |
| 2   | 96025765  | 2:96025765  | A  | G  | 0.8428 | 0.0783        | 1.63E-08 |
| 2   | 102468624 | 2:102468624 | A  | G  | 0.7042 | 0.0762        | 1.27E-12 |
| 2   | 135443940 | 2:135443940 | A  | G  | 0.8109 | 0.0757        | 1.22E-09 |
| 2   | 135464616 | 2:135464616 | A  | G  | 0.7185 | 0.0807        | 4.55E-14 |
| 2   | 168979290 | 2:168979290 | T  | C  | 0.3351 | -0.0563       | 3.50E-08 |
| 2   | 169023263 | 2:169023263 | T  | C  | 0.9867 | -0.3186       | 4.03E-11 |
| 2   | 169110394 | 2:169110394 | T  | C  | 0.1312 | 0.1796        | 2.54E-39 |
| 2   | 169161223 | 2:169161223 | T  | C  | 0.6061 | 0.0541        | 4.49E-08 |
| 3   | 18361759  | 3:18361759  | A  | C  | 0.9592 | -0.1693       | 5.94E-13 |
| 3   | 28700178  | 3:28700178  | A  | G  | 0.3782 | 0.0655        | 7.94E-12 |

|   |           |             |   |   |        |         |           |
|---|-----------|-------------|---|---|--------|---------|-----------|
| 3 | 48333546  | 3:48333546  | T | C | 0.4867 | -0.0612 | 7.65E-09  |
| 3 | 48748989  | 3:48748989  | T | G | 0.6476 | 0.0636  | 1.36E-10  |
| 3 | 49025101  | 3:49025101  | A | C | 0.3425 | -0.0584 | 4.04E-09  |
| 3 | 122196892 | 3:122196892 | T | C | 0.1722 | 0.0861  | 9.98E-12  |
| 3 | 151112968 | 3:151112968 | A | C | 0.3691 | -0.0631 | 9.53E-11  |
| 3 | 161077630 | 3:161077630 | A | G | 0.6742 | -0.0616 | 5.01E-10  |
| 3 | 182760073 | 3:182760073 | T | G | 0.8112 | 0.1485  | 1.22E-34  |
| 3 | 182852214 | 3:182852214 | T | C | 0.0213 | -0.2404 | 4.01E-08  |
| 4 | 734351    | 4:734351    | A | G | 0.4825 | 0.0678  | 1.49E-12  |
| 4 | 759463    | 4:759463    | A | G | 0.0838 | 0.0927  | 3.36E-08  |
| 4 | 802144    | 4:802144    | T | C | 0.0354 | -0.2113 | 1.65E-12  |
| 4 | 925149    | 4:925149    | T | C | 0.6308 | 0.1074  | 1.36E-27  |
| 4 | 951161    | 4:951161    | T | C | 0.1656 | 0.1127  | 2.44E-19  |
| 4 | 951947    | 4:951947    | T | C | 0.8065 | -0.2126 | 9.98E-70  |
| 4 | 982345    | 4:982345    | T | C | 0.0237 | 0.2103  | 2.88E-09  |
| 4 | 15620408  | 4:15620408  | T | C | 0.9022 | 0.1014  | 2.53E-10  |
| 4 | 15737348  | 4:15737348  | A | G | 0.5529 | 0.1035  | 2.06E-28  |
| 4 | 15757601  | 4:15757601  | T | C | 0.9593 | 0.1785  | 6.27E-13  |
| 4 | 15829612  | 4:15829612  | A | G | 0.3186 | 0.0574  | 1.03E-08  |
| 4 | 17976846  | 4:17976846  | A | C | 0.163  | -0.0818 | 3.16E-10  |
| 4 | 77111032  | 4:77111032  | T | C | 0.3099 | -0.0624 | 9.53E-10  |
| 4 | 77147969  | 4:77147969  | A | G | 0.7107 | -0.0912 | 4.97E-19  |
| 4 | 77198054  | 4:77198054  | T | C | 0.3632 | -0.0912 | 5.82E-21  |
| 4 | 77202861  | 4:77202861  | A | G | 0.4148 | -0.0546 | 4.30E-08  |
| 4 | 77280542  | 4:77280542  | A | G | 0.0686 | 0.1309  | 1.61E-08  |
| 4 | 90368545  | 4:90368545  | A | G | 0.0299 | 0.1983  | 1.75E-10  |
| 4 | 90431418  | 4:90431418  | T | C | 0.3673 | 0.0695  | 1.32E-12  |
| 4 | 90474291  | 4:90474291  | T | C | 0.6745 | 0.0684  | 1.08E-11  |
| 4 | 90503603  | 4:90503603  | A | G | 0.0529 | 0.1383  | 2.72E-10  |
| 4 | 90594987  | 4:90594987  | A | G | 0.209  | -0.0995 | 1.93E-13  |
| 4 | 90606518  | 4:90606518  | T | G | 0.8674 | 0.1055  | 4.16E-13  |
| 4 | 90608959  | 4:90608959  | T | C | 0.1171 | -0.1109 | 1.44E-13  |
| 4 | 90626111  | 4:90626111  | A | G | 0.6278 | -0.2774 | 3.89E-154 |
| 4 | 90627967  | 4:90627967  | A | G | 0.0189 | -0.3116 | 7.26E-12  |
| 4 | 90653134  | 4:90653134  | T | C | 0.0833 | 0.1586  | 1.12E-15  |
| 4 | 90684278  | 4:90684278  | A | G | 0.9264 | -0.337  | 3.03E-82  |
| 4 | 90742296  | 4:90742296  | A | G | 0.0115 | -0.2565 | 4.16E-08  |
| 4 | 90757294  | 4:90757294  | A | C | 0.2115 | -0.2042 | 2.21E-68  |
| 4 | 90774120  | 4:90774120  | T | C | 0.9687 | 0.2697  | 1.13E-13  |
| 4 | 90803192  | 4:90803192  | T | C | 0.0361 | -0.1975 | 4.93E-13  |
| 4 | 90835558  | 4:90835558  | T | C | 0.0374 | 0.1871  | 1.83E-10  |
| 4 | 90843448  | 4:90843448  | T | G | 0.043  | 0.1272  | 4.48E-08  |
| 4 | 90848275  | 4:90848275  | T | G | 0.9335 | -0.1765 | 1.06E-15  |
| 4 | 91010118  | 4:91010118  | T | G | 0.9515 | -0.2539 | 2.00E-26  |
| 4 | 91024178  | 4:91024178  | T | G | 0.0331 | -0.2342 | 2.75E-08  |
| 4 | 91307991  | 4:91307991  | A | G | 0.971  | -0.2868 | 2.87E-21  |
| 4 | 114369065 | 4:114369065 | T | C | 0.1744 | 0.0875  | 9.82E-13  |
| 4 | 170583157 | 4:170583157 | A | G | 0.3264 | -0.0638 | 2.00E-10  |
| 5 | 59872406  | 5:59872406  | T | C | 0.0712 | 0.1302  | 7.92E-13  |
| 5 | 60137959  | 5:60137959  | A | G | 0.9019 | -0.1554 | 2.52E-23  |
| 5 | 60461194  | 5:60461194  | A | C | 0.1084 | 0.1393  | 7.37E-21  |
| 5 | 102363402 | 5:102363402 | T | C | 0.6996 | 0.0608  | 2.42E-09  |
| 5 | 124110273 | 5:124110273 | T | C | 0.0986 | 0.1141  | 1.02E-08  |
| 5 | 133930528 | 5:133930528 | A | G | 0.1025 | -0.0874 | 2.10E-08  |

|    |           |              |   |   |        |         |          |
|----|-----------|--------------|---|---|--------|---------|----------|
| 5  | 134199105 | 5:134199105  | A | C | 0.102  | -0.0916 | 7.16E-09 |
| 6  | 27298905  | 6:27298905   | T | C | 0.2393 | 0.0614  | 1.41E-08 |
| 6  | 27564830  | 6:27564830   | A | G | 0.1231 | -0.0851 | 1.32E-08 |
| 6  | 27738801  | 6:27738801   | A | G | 0.2081 | 0.0833  | 5.62E-12 |
| 6  | 28054198  | 6:28054198   | A | G | 0.9175 | -0.0926 | 2.94E-08 |
| 6  | 30108683  | 6:30108683   | T | C | 0.2451 | -0.0635 | 1.62E-08 |
| 6  | 31590354  | 6:31590354   | A | G | 0.8498 | -0.0752 | 1.94E-08 |
| 6  | 31846234  | 6:31846234   | A | G | 0.2004 | 0.079   | 3.65E-11 |
| 6  | 32303848  | 6:32303848   | A | G | 0.1902 | -0.0929 | 8.25E-13 |
| 6  | 32395036  | 6:32395036   | T | C | 0.7033 | -0.0727 | 8.39E-12 |
| 6  | 32578772  | 6:32578772   | A | C | 0.163  | -0.1676 | 6.96E-28 |
| 6  | 32941506  | 6:32941506   | T | C | 0.0299 | -0.1718 | 1.50E-08 |
| 6  | 72489033  | 6:72489033   | T | C | 0.2844 | 0.0657  | 1.60E-10 |
| 6  | 112243291 | 6:112243291  | A | G | 0.8049 | 0.0714  | 1.84E-09 |
| 6  | 133210361 | 6:133210361  | T | C | 0.9673 | -0.2207 | 1.04E-10 |
| 7  | 23300049  | 7:23300049   | A | C | 0.5939 | 0.1016  | 5.25E-26 |
| 8  | 11712443  | 8:11712443   | A | C | 0.7444 | 0.093   | 3.99E-16 |
| 8  | 16697593  | 8:16697593   | T | G | 0.2682 | -0.0856 | 2.72E-15 |
| 8  | 22525980  | 8:22525980   | T | C | 0.3604 | 0.0556  | 1.16E-08 |
| 8  | 130901909 | 8:130901909  | T | C | 0.7225 | -0.0605 | 1.81E-08 |
| 9  | 17579690  | 9:17579690   | T | G | 0.3422 | -0.0859 | 8.72E-18 |
| 9  | 17724256  | 9:17724256   | A | G | 0.7421 | -0.0905 | 1.66E-17 |
| 9  | 34046391  | 9:34046391   | T | C | 0.7336 | -0.0615 | 6.58E-09 |
| 10 | 15557406  | 10:15557406  | T | C | 0.6892 | 0.0735  | 3.41E-13 |
| 10 | 104015279 | 10:104015279 | A | G | 0.8514 | -0.079  | 1.05E-09 |
| 10 | 121260786 | 10:121260786 | A | G | 0.9855 | -0.3967 | 5.39E-15 |
| 10 | 121361986 | 10:121361986 | T | C | 0.4119 | -0.0557 | 4.27E-09 |
| 10 | 121459087 | 10:121459087 | A | G | 0.5276 | -0.0697 | 1.47E-13 |
| 10 | 121536327 | 10:121536327 | A | G | 0.0166 | 0.4354  | 2.36E-28 |
| 10 | 121667020 | 10:121667020 | T | C | 0.7334 | 0.0658  | 2.45E-09 |
| 10 | 121842595 | 10:121842595 | A | G | 0.0391 | 0.1927  | 1.30E-11 |
| 11 | 10558777  | 11:10558777  | A | G | 0.8776 | 0.087   | 2.12E-09 |
| 11 | 83487277  | 11:83487277  | A | C | 0.4148 | -0.0645 | 2.61E-10 |
| 11 | 133727086 | 11:133727086 | A | C | 0.7324 | 0.0605  | 1.55E-08 |
| 11 | 133787001 | 11:133787001 | T | G | 0.2054 | 0.1073  | 6.26E-20 |
| 12 | 32491673  | 12:32491673  | A | G | 0.9879 | -0.2978 | 2.54E-10 |
| 12 | 32979905  | 12:32979905  | A | G | 0.99   | -0.4402 | 2.63E-10 |
| 12 | 33722644  | 12:33722644  | A | G | 0.0162 | 0.3051  | 7.97E-10 |
| 12 | 33990346  | 12:33990346  | T | G | 0.0156 | 0.3058  | 1.38E-09 |
| 12 | 34246508  | 12:34246508  | A | G | 0.9894 | -0.6826 | 5.29E-18 |
| 12 | 40349236  | 12:40349236  | A | G | 0.0374 | 0.1589  | 2.84E-09 |
| 12 | 40378773  | 12:40378773  | T | C | 0.2863 | 0.0649  | 5.32E-10 |
| 12 | 40388109  | 12:40388109  | T | C | 0.0257 | 0.3869  | 2.69E-37 |
| 12 | 40437969  | 12:40437969  | A | G | 0.978  | -0.3028 | 1.50E-21 |
| 12 | 40614656  | 12:40614656  | A | G | 0.331  | -0.0878 | 1.91E-18 |
| 12 | 40616414  | 12:40616414  | A | G | 0.9472 | 0.12    | 2.10E-08 |
| 12 | 40617202  | 12:40617202  | T | C | 0.8783 | -0.1276 | 7.75E-20 |
| 12 | 40774678  | 12:40774678  | A | G | 0.0262 | 0.2488  | 6.07E-16 |
| 12 | 40885549  | 12:40885549  | T | C | 0.0219 | 0.4182  | 4.49E-25 |
| 12 | 40989183  | 12:40989183  | A | G | 0.6325 | 0.0558  | 4.23E-08 |
| 12 | 41251554  | 12:41251554  | A | G | 0.9743 | -0.2393 | 4.50E-16 |
| 12 | 42535403  | 12:42535403  | T | C | 0.9856 | -0.3993 | 1.82E-10 |
| 12 | 46419086  | 12:46419086  | T | C | 0.404  | -0.0539 | 3.96E-08 |
| 12 | 123123414 | 12:123123414 | A | G | 0.2514 | 0.0703  | 1.63E-10 |

|    |           |              |   |   |        |         |          |
|----|-----------|--------------|---|---|--------|---------|----------|
| 12 | 123195310 | 12:123195310 | T | C | 0.6175 | 0.0558  | 4.17E-08 |
| 12 | 123326598 | 12:123326598 | T | G | 0.364  | 0.1478  | 1.47E-37 |
| 12 | 123488399 | 12:123488399 | A | C | 0.0214 | 0.2528  | 1.80E-08 |
| 12 | 123656809 | 12:123656809 | A | G | 0.3784 | 0.0612  | 3.23E-10 |
| 12 | 133058157 | 12:133058157 | A | G | 0.5061 | 0.0599  | 1.64E-10 |
| 13 | 49927732  | 13:49927732  | T | C | 0.7397 | 0.0617  | 1.15E-08 |
| 13 | 50296115  | 13:50296115  | T | C | 0.8615 | -0.0972 | 2.24E-08 |
| 13 | 97865021  | 13:97865021  | T | C | 0.2295 | 0.0675  | 1.45E-09 |
| 14 | 37989270  | 14:37989270  | T | C | 0.4376 | -0.0529 | 3.54E-08 |
| 14 | 55348869  | 14:55348869  | T | C | 0.3245 | -0.0842 | 1.66E-16 |
| 14 | 55967795  | 14:55967795  | T | C | 0.3003 | -0.0586 | 4.00E-08 |
| 14 | 56191413  | 14:56191413  | T | C | 0.4408 | -0.0566 | 1.56E-09 |
| 14 | 75373034  | 14:75373034  | A | C | 0.7866 | 0.0707  | 1.92E-09 |
| 14 | 88472612  | 14:88472612  | T | C | 0.4405 | 0.0612  | 5.81E-11 |
| 15 | 61997385  | 15:61997385  | T | C | 0.1417 | -0.1186 | 6.08E-18 |
| 16 | 19279380  | 16:19279380  | T | C | 0.451  | 0.0621  | 3.90E-11 |
| 16 | 28952638  | 16:28952638  | T | C | 0.3062 | -0.0644 | 1.20E-09 |
| 16 | 30977799  | 16:30977799  | A | G | 0.6442 | 0.0907  | 5.12E-20 |
| 16 | 31004169  | 16:31004169  | T | C | 0.7352 | 0.0757  | 4.36E-09 |
| 16 | 50736656  | 16:50736656  | A | G | 0.5985 | 0.0586  | 1.82E-09 |
| 16 | 52636242  | 16:52636242  | A | C | 0.4343 | 0.0668  | 1.29E-12 |
| 16 | 52969426  | 16:52969426  | A | G | 0.0932 | -0.1156 | 1.08E-10 |
| 16 | 52973421  | 16:52973421  | A | G | 0.4608 | -0.056  | 2.82E-08 |
| 17 | 7355621   | 17:7355621   | A | C | 0.6484 | -0.0565 | 1.01E-08 |
| 17 | 40741013  | 17:40741013  | T | C | 0.7349 | 0.0642  | 1.40E-09 |
| 17 | 40782389  | 17:40782389  | T | C | 0.1951 | 0.0686  | 4.43E-08 |
| 17 | 42294462  | 17:42294462  | A | G | 0.6529 | 0.0631  | 5.99E-10 |
| 17 | 42434630  | 17:42434630  | A | G | 0.6056 | -0.071  | 1.29E-11 |
| 17 | 43278576  | 17:43278576  | T | C | 0.3175 | -0.0653 | 6.84E-09 |
| 17 | 43445792  | 17:43445792  | A | G | 0.3388 | -0.0833 | 9.02E-15 |
| 17 | 43472507  | 17:43472507  | A | G | 0.7297 | -0.0806 | 1.63E-13 |
| 17 | 43744203  | 17:43744203  | T | C | 0.1552 | -0.27   | 3.58E-68 |
| 17 | 43798308  | 17:43798308  | A | G | 0.067  | -0.2324 | 6.71E-16 |
| 17 | 43848495  | 17:43848495  | T | G | 0.6364 | -0.0861 | 1.00E-17 |
| 17 | 43935838  | 17:43935838  | T | C | 0.3447 | 0.0975  | 1.51E-19 |
| 17 | 44019712  | 17:44019712  | A | G | 0.3726 | 0.0707  | 2.39E-12 |
| 17 | 44071851  | 17:44071851  | A | G | 0.4078 | -0.1289 | 2.45E-39 |
| 17 | 44141223  | 17:44141223  | T | C | 0.0719 | 0.1529  | 4.98E-08 |
| 17 | 44189067  | 17:44189067  | A | G | 0.6094 | 0.1351  | 1.84E-40 |
| 17 | 44808902  | 17:44808902  | A | G | 0.2311 | -0.2043 | 7.95E-67 |
| 17 | 44852612  | 17:44852612  | A | C | 0.7272 | -0.0962 | 9.03E-14 |
| 17 | 44908263  | 17:44908263  | T | C | 0.6511 | 0.0622  | 3.87E-09 |
| 17 | 59917366  | 17:59917366  | T | C | 0.1641 | 0.082   | 9.28E-10 |
| 17 | 60188441  | 17:60188441  | A | G | 0.1614 | 0.078   | 2.65E-09 |
| 17 | 76419637  | 17:76419637  | T | C | 0.8299 | 0.0759  | 3.12E-09 |
| 18 | 31304318  | 18:31304318  | T | G | 0.4983 | 0.0531  | 1.69E-08 |
| 18 | 40673380  | 18:40673380  | A | G | 0.6816 | -0.0983 | 3.80E-23 |
| 18 | 40852502  | 18:40852502  | A | C | 0.9153 | -0.1071 | 4.73E-10 |
| 18 | 48683589  | 18:48683589  | T | G | 0.5496 | -0.0578 | 1.41E-08 |
| 19 | 2341047   | 19:2341047   | T | C | 0.6937 | -0.0696 | 4.18E-10 |
| 20 | 3164686   | 20:3164686   | T | C | 0.6105 | 0.0622  | 8.45E-11 |
| 20 | 6008226   | 20:6008226   | A | C | 0.8692 | -0.0788 | 7.89E-09 |
| 21 | 38852361  | 21:38852361  | A | G | 0.2828 | 0.0714  | 2.74E-11 |

CHR: Chromosome, BP: Base Pair, A1: Effect allele, A2: Other allele, freq: Frequency, Beta: Beta-coefficient (weight), P: P value.

### Supplementary table 15: SNPS used to calculate the adaptive immunity PD-PRS, Mayo Clinic

Description of SNPs, weights and p values used to calculate the adaptive immunity PD-PRS in the Mayo Clinic samples.

| CHR | BP        | SNP         | A1 | A2 | freq   | beta (weight) | P        | gene     |
|-----|-----------|-------------|----|----|--------|---------------|----------|----------|
| 1   | 161617516 | 1:161617516 | A  | G  | 0.8556 | -0.1042       | 2.48E-08 | FCGR2B   |
| 3   | 48962128  | 3:48962128  | T  | G  | 0.3433 | -0.0593       | 2.64E-09 | ARIH2    |
| 3   | 122289005 | 3:122289005 | A  | G  | 0.8323 | -0.0834       | 1.19E-09 | DTX3L    |
| 4   | 15680918  | 4:15680918  | A  | G  | 0.63   | 0.067         | 4.64E-12 | FBXL5    |
| 5   | 134036784 | 5:134036784 | A  | G  | 0.0993 | -0.0916       | 1.51E-08 | SEC24A   |
| 6   | 32371915  | 6:32371915  | T  | C  | 0.2078 | -0.1114       | 9.13E-20 | BTNL2    |
| 6   | 32429594  | 6:32429594  | A  | G  | 0.4296 | 0.0611        | 1.13E-09 | HLA-DRB3 |
| 6   | 32796310  | 6:32796310  | A  | G  | 0.9741 | 0.2022        | 3.86E-09 | TAP2     |
| 6   | 112164313 | 6:112164313 | A  | G  | 0.143  | -0.0802       | 3.25E-09 | FYN      |
| 8   | 11712443  | 8:11712443  | A  | C  | 0.7444 | 0.093         | 3.99E-16 | CTSB     |
| 9   | 17579690  | 9:17579690  | T  | G  | 0.3422 | -0.0859       | 8.72E-18 | SH3GL2   |
| 9   | 17724256  | 9:17724256  | A  | G  | 0.7421 | -0.0905       | 1.66E-17 | SH3GL2   |
| 9   | 33894945  | 9:33894945  | T  | C  | 0.2685 | 0.0595        | 1.56E-08 | UBE2R2   |
| 14  | 75173490  | 14:75173490 | A  | G  | 0.2145 | -0.0675       | 3.47E-08 | AREL1    |
| 16  | 30943096  | 16:30943096 | A  | G  | 0.3488 | -0.0907       | 7.55E-20 | FBXL19   |
| 17  | 43370481  | 17:43370481 | T  | C  | 0.2642 | -0.0786       | 4.36E-13 | MAP3K14  |
| 18  | 48722080  | 18:48722080 | A  | G  | 0.546  | -0.0557       | 2.85E-08 | MEX3C    |

CHR: Chromosome, BP: Base Pair, A1: Effect allele, A2: Other allele, freq: Frequency, Beta: Beta-coefficient (weight), P: P value.

### Supplementary table 16: SNPs used to calculate the alpha synuclein PD-PRS (Mayo Clinic)

Description of SNPs, weights and p values used to calculate the alpha synuclein PD-PRS in the Mayo Clinic samples.

| CHR | BP        | SNP          | A1 | A2 | freq   | beta (weight) | P         | gene |
|-----|-----------|--------------|----|----|--------|---------------|-----------|------|
| 4   | 90666041  | 4:90666041   | T  | C  | 0.6149 | -0.2504       | 5.16E-149 | SNCA |
| 4   | 90671549  | 4:90671549   | A  | G  | 0.9201 | -0.3213       | 4.36E-77  | SNCA |
| 4   | 90700329  | 4:90700329   | T  | C  | 0.9622 | -0.1696       | 6.22E-10  | SNCA |
| 4   | 90742296  | 4:90742296   | A  | G  | 0.0115 | -0.2565       | 4.16E-08  | SNCA |
| 4   | 90757294  | 4:90757294   | A  | C  | 0.2115 | -0.2042       | 2.21E-68  | SNCA |
| 6   | 112164313 | 6:112164313  | A  | G  | 0.143  | -0.0802       | 3.25E-09  | FYN  |
| 10  | 121178783 | 10:121178783 | T  | C  | 0.0252 | 0.1912        | 4.30E-08  | GRK5 |

CHR: Chromosome, BP: Base Pair, A1: Effect allele, A2: Other allele, freq: Frequency, Beta: Beta-coefficient (weight), P: P value.



### Supplementary table 17: SNPs used to calculate the innate immunity PD-PRS (Mayo Clinic)

Description of SNPs, weights and p values used to calculate the innate immunity PD-PRS in the Mayo Clinic samples.

| CHR | BP        | SNP         | A1 | A2 | freq   | beta (weight) | P        | gene    |
|-----|-----------|-------------|----|----|--------|---------------|----------|---------|
| 1   | 161478859 | 1:161478859 | T  | C  | 0.4948 | -0.0643       | 8.03E-12 | FCGR2A  |
| 3   | 48719638  | 3:48719638  | T  | C  | 0.3562 | -0.0603       | 1.55E-08 | NCKIPSD |
| 4   | 15728176  | 4:15728176  | A  | G  | 0.0308 | -0.1919       | 9.25E-11 | BST1    |
| 4   | 15737348  | 4:15737348  | A  | G  | 0.5529 | 0.1035        | 2.06E-28 | BST1    |
| 6   | 31881731  | 6:31881731  | A  | G  | 0.6614 | -0.065        | 3.64E-10 | C2      |
| 6   | 112164313 | 6:112164313 | A  | G  | 0.143  | -0.0802       | 3.25E-09 | FYN     |
| 8   | 11712443  | 8:11712443  | A  | C  | 0.7444 | 0.093         | 3.99E-16 | CTSB    |
| 16  | 50736656  | 16:50736656 | A  | G  | 0.5985 | 0.0586        | 1.82E-09 | NOD2    |
| 17  | 42430244  | 17:42430244 | T  | C  | 0.293  | 0.0672        | 1.20E-08 | GRN     |
| 17  | 43370481  | 17:43370481 | T  | C  | 0.2642 | -0.0786       | 4.36E-13 | MAP3K14 |

CHR: Chromosome, BP: Base Pair, A1: Effect allele, A2: Other allele, freq: Frequency, Beta: Beta-coefficient (weight), P: P value.

### Supplementary table 18: SNPs used to calculate the lysosomal PD-PRS (Mayo Clinic)

Description of SNPs, weights and p values used to calculate the lysosomal PD-PRS in the Mayo Clinic samples.

| CHR | BP        | SNP          | A1 | A2 | freq   | beta (weight) | P        | gene   |
|-----|-----------|--------------|----|----|--------|---------------|----------|--------|
| 1   | 155206167 | 1:155206167  | T  | C  | 0.0162 | 0.6357        | 9.13E-48 | GBA    |
| 3   | 182851513 | 3:182851513  | A  | G  | 0.8726 | 0.1252        | 1.48E-18 | LAMP3  |
| 3   | 182867869 | 3:182867869  | A  | G  | 0.8314 | 0.073         | 6.15E-09 | LAMP3  |
| 4   | 980896    | 4:980896     | A  | C  | 0.4209 | -0.115        | 4.09E-29 | IDUA   |
| 4   | 982345    | 4:982345     | T  | C  | 0.0237 | 0.2103        | 2.88E-09 | IDUA   |
| 4   | 989022    | 4:989022     | A  | G  | 0.8773 | -0.1646       | 4.64E-24 | IDUA   |
| 4   | 77111032  | 4:77111032   | T  | C  | 0.3099 | -0.0624       | 9.53E-10 | SCARB2 |
| 4   | 77134786  | 4:77134786   | T  | C  | 0.3451 | 0.0747        | 3.39E-14 | SCARB2 |
| 8   | 11712443  | 8:11712443   | A  | C  | 0.7444 | 0.093         | 3.99E-16 | CTSB   |
| 12  | 123424071 | 12:123424071 | A  | G  | 0.5862 | -0.0706       | 2.75E-13 | ABC9   |
| 12  | 123457143 | 12:123457143 | T  | C  | 0.022  | 0.2479        | 2.39E-08 | ABC9   |
| 14  | 88410811  | 14:88410811  | A  | C  | 0.6258 | -0.0614       | 2.62E-10 | GALC   |

CHR: Chromosome, BP: Base Pair, A1: Effect allele, A2: Other allele, freq: Frequency, Beta: Beta-coefficient (weight), P: P value.

### Supplementary table 19: SNPs used to calculate the lysosomal PD-PRS excluding GBA (Mayo Clinic)

Description of SNPs, weights and p values used to calculate the lysosomal PD-PRS excluding GBA in the Mayo Clinic samples.

| CHR | BP        | SNP         | A1 | A2 | freq   | beta (weight) | P        | gene   |
|-----|-----------|-------------|----|----|--------|---------------|----------|--------|
| 3   | 182851513 | 3:182851513 | A  | G  | 0.8726 | 0.1252        | 1.48E-18 | LAMP3  |
| 3   | 182867869 | 3:182867869 | A  | G  | 0.8314 | 0.073         | 6.15E-09 | LAMP3  |
| 4   | 980896    | 4:980896    | A  | C  | 0.4209 | -0.115        | 4.09E-29 | IDUA   |
| 4   | 982345    | 4:982345    | T  | C  | 0.0237 | 0.2103        | 2.88E-09 | IDUA   |
| 4   | 989022    | 4:989022    | A  | G  | 0.8773 | -0.1646       | 4.64E-24 | IDUA   |
| 4   | 77111032  | 4:77111032  | T  | C  | 0.3099 | -0.0624       | 9.53E-10 | SCARB2 |

|    |           |              |   |   |        |         |          |        |
|----|-----------|--------------|---|---|--------|---------|----------|--------|
| 4  | 77134786  | 4:77134786   | T | C | 0.3451 | 0.0747  | 3.39E-14 | SCARB2 |
| 8  | 11712443  | 8:11712443   | A | C | 0.7444 | 0.093   | 3.99E-16 | CTSB   |
| 12 | 123424071 | 12:123424071 | A | G | 0.5862 | -0.0706 | 2.75E-13 | ABCB9  |
| 12 | 123457143 | 12:123457143 | T | C | 0.022  | 0.2479  | 2.39E-08 | ABCB9  |
| 14 | 88410811  | 14:88410811  | A | C | 0.6258 | -0.0614 | 2.62E-10 | GALC   |

CHR: Chromosome, BP: Base Pair, A1: Effect allele, A2: Other allele, freq: Frequency, Beta: Beta-coefficient (weight), P: P value.

### Supplementary table 20: SNPs used to calculate the endocytic membrane trafficking PD-PRS (Mayo Clinic)

Description of SNPs, weights and p values used to calculate the endocytic membrane trafficking PD-PRS in the Mayo Clinic samples.

| CHR | BP        | SNP          | A1 | A2 | freq   | beta (weight) | P        | gene    |
|-----|-----------|--------------|----|----|--------|---------------|----------|---------|
| 1   | 171673236 | 1:171673236  | A  | G  | 0.1957 | -0.0697       | 6.53E-09 | VAMP4   |
| 4   | 893712    | 4:893712     | T  | C  | 0.161  | 0.1142        | 1.02E-18 | GAK     |
| 4   | 906903    | 4:906903     | T  | C  | 0.1158 | 0.1681        | 2.22E-30 | GAK     |
| 4   | 925149    | 4:925149     | T  | C  | 0.6308 | 0.1074        | 1.36E-27 | GAK     |
| 9   | 17579690  | 9:17579690   | T  | G  | 0.3422 | -0.0859       | 8.72E-18 | SH3GL2  |
| 9   | 17724256  | 9:17724256   | A  | G  | 0.7421 | -0.0905       | 1.66E-17 | SH3GL2  |
| 12  | 123379193 | 12:123379193 | T  | C  | 0.2984 | -0.0828       | 4.22E-09 | VPS37B  |
| 17  | 43565690  | 17:43565690  | T  | C  | 0.7804 | -0.0869       | 2.39E-08 | PLEKHM1 |
| 18  | 40852502  | 18:40852502  | A  | C  | 0.9153 | -0.1071       | 4.73E-10 | SYT4    |

CHR: Chromosome, BP: Base Pair, A1: Effect allele, A2: Other allele, freq: Frequency, Beta: Beta-coefficient (weight), P: P value.

### Supplementary table 21: SNPs used to calculate the mitochondria PD-PRS (Mayo Clinic)

Description of SNPs, weights and p values used to calculate the mitochondria PD-PRS in the Mayo Clinic samples.

| CHR | BP        | SNP          | A1 | A2 | freq   | beta (weight) | P        | gene  |
|-----|-----------|--------------|----|----|--------|---------------|----------|-------|
| 12  | 123424071 | 12:123424071 | A  | G  | 0.5862 | -0.0706       | 2.75E-13 | ABCB9 |
| 16  | 31121793  | 16:31121793  | A  | G  | 0.3853 | 0.0743        | 1.49E-14 | BCKDK |

CHR: Chromosome, BP: Base Pair, A1: Effect allele, A2: Other allele, freq: Frequency, Beta: Beta-coefficient (weight), P: P value.

### Supplementary table 22: SNPs used to calculate the microglia PD-PRS (Mayo Clinic)

Description of SNPs, weights and p values used to calculate the microglia PD-PRS in the Mayo Clinic samples.

| CHR | BP        | SNP         | A1 | A2 | freq   | beta (weight) | P        | gene |
|-----|-----------|-------------|----|----|--------|---------------|----------|------|
| 1   | 155108167 | 1:155108167 | A  | G  | 0.0174 | 0.6343        | 1.68E-54 |      |
| 1   | 171711152 | 1:171711152 | A  | C  | 0.8055 | 0.0674        | 1.32E-08 |      |
| 1   | 205719532 | 1:205719532 | A  | G  | 0.5657 | 0.1063        | 1.14E-29 |      |
| 1   | 226912135 | 1:226912135 | A  | G  | 0.385  | -0.0581       | 1.63E-09 |      |
| 2   | 102389681 | 2:102389681 | A  | G  | 0.6653 | -0.0683       | 3.57E-12 |      |
| 2   | 135464616 | 2:135464616 | A  | G  | 0.7185 | 0.0807        | 4.55E-14 |      |
| 2   | 169067946 | 2:169067946 | T  | C  | 0.1663 | 0.0789        | 3.60E-10 |      |
| 3   | 18199602  | 3:18199602  | A  | G  | 0.9707 | -0.1919       | 3.68E-10 |      |

|    |           |              |   |   |        |         |          |
|----|-----------|--------------|---|---|--------|---------|----------|
| 3  | 49045355  | 3:49045355   | T | C | 0.3416 | -0.059  | 4.10E-09 |
| 3  | 122135255 | 3:122135255  | T | G | 0.8378 | -0.0848 | 2.70E-11 |
| 3  | 151109711 | 3:151109711  | A | G | 0.6324 | 0.0624  | 1.47E-10 |
| 3  | 161051793 | 3:161051793  | A | G | 0.3223 | 0.0573  | 8.36E-09 |
| 3  | 182803656 | 3:182803656  | T | C | 0.1341 | -0.138  | 4.37E-23 |
| 4  | 980896    | 4:980896     | A | C | 0.4209 | -0.115  | 4.09E-29 |
| 4  | 18024121  | 4:18024121   | T | C | 0.1622 | -0.0813 | 9.64E-10 |
| 4  | 77140733  | 4:77140733   | T | C | 0.4107 | 0.0779  | 1.76E-16 |
| 4  | 77420822  | 4:77420822   | A | C | 0.4815 | -0.052  | 3.13E-08 |
| 4  | 90750844  | 4:90750844   | T | C | 0.7933 | 0.1909  | 3.41E-39 |
| 4  | 90810807  | 4:90810807   | T | C | 0.0431 | 0.2917  | 2.09E-38 |
| 4  | 114369065 | 4:114369065  | T | C | 0.1744 | 0.0875  | 9.82E-13 |
| 5  | 59930164  | 5:59930164   | A | C | 0.068  | 0.1369  | 1.22E-13 |
| 5  | 60240986  | 5:60240986   | A | G | 0.3591 | 0.0644  | 1.20E-10 |
| 5  | 133922901 | 5:133922901  | T | C | 0.8881 | 0.0826  | 4.39E-08 |
| 6  | 27722064  | 6:27722064   | T | C | 0.7631 | -0.0712 | 9.38E-11 |
| 6  | 31707730  | 6:31707730   | T | C | 0.0671 | 0.12    | 2.54E-09 |
| 6  | 32294992  | 6:32294992   | A | G | 0.4063 | -0.0558 | 2.82E-08 |
| 6  | 32577715  | 6:32577715   | T | G | 0.7211 | -0.0722 | 2.00E-09 |
| 6  | 32577973  | 6:32577973   | T | G | 0.8406 | 0.1637  | 9.19E-28 |
| 7  | 23245569  | 7:23245569   | A | G | 0.6077 | 0.1025  | 1.15E-25 |
| 8  | 11702375  | 8:11702375   | A | G | 0.2595 | -0.0879 | 1.89E-15 |
| 8  | 16716926  | 8:16716926   | T | G | 0.7304 | 0.0791  | 1.06E-13 |
| 10 | 121410917 | 10:121410917 | T | C | 0.0175 | 0.4152  | 3.27E-21 |
| 10 | 121484999 | 10:121484999 | A | G | 0.4088 | 0.0586  | 5.58E-10 |
| 12 | 40500195  | 12:40500195  | A | C | 0.0236 | 0.185   | 1.46E-09 |
| 12 | 40602765  | 12:40602765  | T | C | 0.0716 | 0.1403  | 2.00E-15 |
| 14 | 55348869  | 14:55348869  | T | C | 0.3245 | -0.0842 | 1.66E-16 |
| 14 | 75359730  | 14:75359730  | T | C | 0.133  | -0.082  | 1.34E-08 |
| 14 | 88472612  | 14:88472612  | T | C | 0.4405 | 0.0612  | 5.81E-11 |
| 16 | 30934075  | 16:30934075  | A | G | 0.6531 | 0.09    | 1.47E-19 |
| 16 | 50715185  | 16:50715185  | A | G | 0.4306 | -0.0577 | 6.01E-09 |
| 17 | 40706273  | 17:40706273  | A | C | 0.2709 | -0.0632 | 8.79E-09 |
| 17 | 44270181  | 17:44270181  | A | G | 0.4131 | 0.097   | 1.32E-15 |
| 17 | 60142898  | 17:60142898  | A | G | 0.1622 | 0.0756  | 3.77E-09 |
| 18 | 48724724  | 18:48724724  | T | C | 0.4525 | 0.0556  | 3.00E-08 |
| 20 | 5986950   | 20:5986950   | A | G | 0.1307 | 0.0765  | 2.89E-08 |

CHR: Chromosome, BP: Base Pair, A1: Effect allele, A2: Other allele, freq: Frequency, Beta: Beta-coefficient (weight), P: P value.

### Supplementary table 23: SNPs used to calculate the monocytes PD-PRS (Mayo Clinic)

Description of SNPs, weights and p values used to calculate the monocytes PD-PRS in the Mayo Clinic samples.

| CHR | BP        | SNP          | A1 | A2 | freq   | beta (weight) | P        |
|-----|-----------|--------------|----|----|--------|---------------|----------|
| 1   | 155074903 | 1:155074903  | T  | G  | 0.4902 | -0.0516       | 4.27E-08 |
| 1   | 155108167 | 1:155108167  | A  | G  | 0.0174 | 0.6343        | 1.68E-54 |
| 1   | 171711152 | 1:171711152  | A  | C  | 0.8055 | 0.0674        | 1.32E-08 |
| 1   | 205719532 | 1:205719532  | A  | G  | 0.5657 | 0.1063        | 1.14E-29 |
| 2   | 102353345 | 2:102353345  | T  | G  | 0.6669 | -0.0671       | 9.79E-12 |
| 2   | 135516504 | 2:135516504  | A  | G  | 0.8381 | 0.0745        | 1.90E-08 |
| 2   | 169067946 | 2:169067946  | T  | C  | 0.1663 | 0.0789        | 3.60E-10 |
| 3   | 48779715  | 3:48779715   | T  | C  | 0.6566 | 0.0589        | 3.76E-09 |
| 3   | 49045355  | 3:49045355   | T  | C  | 0.3416 | -0.059        | 4.10E-09 |
| 3   | 122135255 | 3:122135255  | T  | G  | 0.8378 | -0.0848       | 2.70E-11 |
| 3   | 182880480 | 3:182880480  | A  | G  | 0.9158 | 0.0988        | 3.32E-08 |
| 4   | 980896    | 4:980896     | A  | C  | 0.4209 | -0.115        | 4.09E-29 |
| 4   | 15685051  | 4:15685051   | T  | C  | 0.5986 | 0.0647        | 1.03E-11 |
| 4   | 15758235  | 4:15758235   | T  | C  | 0.794  | 0.1           | 3.93E-17 |
| 4   | 15810779  | 4:15810779   | T  | G  | 0.0448 | -0.1551       | 4.05E-11 |
| 4   | 18024121  | 4:18024121   | T  | C  | 0.1622 | -0.0813       | 9.64E-10 |
| 4   | 77134786  | 4:77134786   | T  | C  | 0.3451 | 0.0747        | 3.39E-14 |
| 4   | 90750844  | 4:90750844   | T  | C  | 0.7933 | 0.1909        | 3.41E-39 |
| 5   | 59995742  | 5:59995742   | A  | C  | 0.0701 | 0.1315        | 3.57E-13 |
| 6   | 31707730  | 6:31707730   | T  | C  | 0.0671 | 0.12          | 2.54E-09 |
| 6   | 32405192  | 6:32405192   | T  | G  | 0.3314 | 0.0558        | 4.61E-08 |
| 6   | 32577715  | 6:32577715   | T  | G  | 0.7211 | -0.0722       | 2.00E-09 |
| 6   | 32577973  | 6:32577973   | T  | G  | 0.8406 | 0.1637        | 9.19E-28 |
| 6   | 112261489 | 6:112261489  | T  | C  | 0.8552 | 0.0786        | 5.51E-09 |
| 7   | 23221870  | 7:23221870   | T  | C  | 0.6082 | 0.1007        | 4.36E-25 |
| 8   | 11660051  | 8:11660051   | A  | G  | 0.251  | -0.0778       | 7.72E-12 |
| 8   | 11681825  | 8:11681825   | T  | C  | 0.4341 | 0.0582        | 8.65E-10 |
| 8   | 11714941  | 8:11714941   | T  | G  | 0.8588 | 0.0797        | 2.13E-08 |
| 8   | 22457388  | 8:22457388   | A  | G  | 0.3342 | 0.0543        | 4.90E-08 |
| 9   | 33818257  | 9:33818257   | T  | C  | 0.7346 | -0.0604       | 2.59E-08 |
| 10  | 104005410 | 10:104005410 | T  | C  | 0.8543 | -0.0795       | 1.24E-09 |
| 10  | 121410917 | 10:121410917 | T  | C  | 0.0175 | 0.4152        | 3.27E-21 |
| 12  | 40602765  | 12:40602765  | T  | C  | 0.0716 | 0.1403        | 2.00E-15 |
| 12  | 40616414  | 12:40616414  | A  | G  | 0.9472 | 0.12          | 2.10E-08 |
| 12  | 40620815  | 12:40620815  | A  | G  | 0.6716 | 0.0871        | 1.53E-12 |
| 12  | 40620881  | 12:40620881  | T  | C  | 0.0334 | 0.2103        | 1.34E-10 |
| 14  | 88472612  | 14:88472612  | T  | C  | 0.4405 | 0.0612        | 5.81E-11 |
| 16  | 30934075  | 16:30934075  | A  | G  | 0.6531 | 0.09          | 1.47E-19 |
| 16  | 50715185  | 16:50715185  | A  | G  | 0.4306 | -0.0577       | 6.01E-09 |
| 17  | 44270181  | 17:44270181  | A  | G  | 0.4131 | 0.097         | 1.32E-15 |
| 17  | 60142898  | 17:60142898  | A  | G  | 0.1622 | 0.0756        | 3.77E-09 |
| 17  | 76413476  | 17:76413476  | T  | C  | 0.1711 | -0.0735       | 2.06E-08 |
| 18  | 48724724  | 18:48724724  | T  | C  | 0.4525 | 0.0556        | 3.00E-08 |
| 20  | 5986950   | 20:5986950   | A  | G  | 0.1307 | 0.0765        | 2.89E-08 |

CHR: Chromosome, BP: Base Pair, A1: Effect allele, A2: Other allele, freq: Frequency, Beta: Beta-coefficient (weight), P: P value.

**Supplementary table 24: SNPs used to calculate the AD-PRS (Mayo Clinic)**  
Description of SNPs, weights and p values used to calculate the AD-PRS in the Mayo Clinic samples.

| CHR | BP        | SNP          | A1 | A2 | freq       | beta (weight) | P         |
|-----|-----------|--------------|----|----|------------|---------------|-----------|
| 1   | 161155392 | 1:161155392  | A  | G  | 0.228026   | 0.016411633   | 1.90E-10  |
| 1   | 207750568 | 1:207750568  | T  | C  | 0.171481   | 0.025417699   | 6.83E-19  |
| 2   | 127891427 | 2:127891427  | C  | A  | 0.411349   | 0.031095063   | 1.45E-44  |
| 2   | 234069512 | 2:234069512  | C  | A  | 0.466846   | 0.012969003   | 2.50E-09  |
| 4   | 11026028  | 4:11026028   | A  | G  | 0.262473   | 0.014704637   | 1.98E-09  |
| 6   | 32415153  | 6:32415153   | T  | C  | 0.165368   | 0.018782338   | 9.91E-11  |
| 6   | 32571122  | 6:32571122   | T  | C  | 0.13012    | -0.020827485  | 8.55E-11  |
| 6   | 32572082  | 6:32572082   | C  | T  | 0.431906   | 0.012420404   | 2.09E-08  |
| 6   | 41129207  | 6:41129207   | T  | C  | 0.00746843 | 0.073707877   | 3.02E-08  |
| 6   | 47432637  | 6:47432637   | C  | T  | 0.355744   | 0.0144515     | 1.99E-10  |
| 7   | 99785750  | 7:99785750   | T  | C  | 0.153295   | 0.016803856   | 3.29E-08  |
| 7   | 99971834  | 7:99971834   | A  | G  | 0.32433    | -0.018395737  | 1.80E-15  |
| 7   | 143108158 | 7:143108158  | T  | C  | 0.485387   | -0.01451867   | 2.89E-11  |
| 8   | 27195121  | 8:27195121   | C  | T  | 0.365676   | 0.015322448   | 8.49E-12  |
| 8   | 27322974  | 8:27322974   | A  | G  | 0.0860179  | -0.022969232  | 2.79E-09  |
| 8   | 27464929  | 8:27464929   | A  | G  | 0.377826   | -0.020161433  | 1.48E-19  |
| 8   | 27494366  | 8:27494366   | C  | T  | 0.0339544  | -0.032869537  | 3.59E-08  |
| 10  | 11717397  | 10:11717397  | C  | T  | 0.360964   | 0.012943374   | 1.04E-08  |
| 11  | 59958380  | 11:59958380  | A  | C  | 0.382122   | -0.017870026  | 1.11E-15  |
| 11  | 85776544  | 11:85776544  | G  | A  | 0.317416   | -0.020428916  | 1.48E-18  |
| 11  | 121435587 | 11:121435587 | C  | T  | 0.0440715  | -0.035926385  | 8.12E-12  |
| 14  | 92938855  | 14:92938855  | A  | G  | 0.33648    | -0.014826611  | 1.32E-10  |
| 15  | 59022615  | 15:59022615  | C  | T  | 0.354342   | -0.013721107  | 1.22E-09  |
| 15  | 63569902  | 15:63569902  | T  | C  | 0.124823   | 0.01802674    | 3.44E-08  |
| 16  | 31133100  | 16:31133100  | A  | G  | 0.298476   | -0.012985226  | 3.73E-08  |
| 17  | 5138980   | 17:5138980   | A  | G  | 0.126086   | 0.019985799   | 7.91E-10  |
| 17  | 47450775  | 17:47450775  | A  | G  | 0.453265   | 0.01230151    | 1.68E-08  |
| 18  | 56189459  | 18:56189459  | C  | T  | 0.0111949  | 0.0567967     | 3.38E-08  |
| 19  | 1043638   | 19:1043638   | T  | C  | 0.247644   | 0.015923035   | 2.38E-10  |
| 19  | 45020859  | 19:45020859  | A  | G  | 0.0308747  | 0.044234873   | 1.28E-12  |
| 19  | 45048858  | 19:45048858  | A  | G  | 0.0326609  | 0.045591355   | 1.49E-12  |
| 19  | 45078886  | 19:45078886  | G  | A  | 0.370126   | -0.017057993  | 3.36E-14  |
| 19  | 45125218  | 19:45125218  | C  | T  | 0.266261   | 0.014992131   | 9.81E-10  |
| 19  | 45137322  | 19:45137322  | C  | T  | 0.00782261 | 0.087405371   | 1.98E-11  |
| 19  | 45152394  | 19:45152394  | C  | T  | 0.284078   | -0.019942754  | 7.68E-17  |
| 19  | 45198477  | 19:45198477  | T  | C  | 0.0407607  | -0.034570888  | 2.63E-10  |
| 19  | 45202052  | 19:45202052  | T  | C  | 0.364998   | -0.016713326  | 8.52E-14  |
| 19  | 45223490  | 19:45223490  | A  | G  | 0.0109178  | 0.106461335   | 5.34E-21  |
| 19  | 45231821  | 19:45231821  | A  | G  | 0.0857099  | -0.037473406  | 2.65E-22  |
| 19  | 45233503  | 19:45233503  | T  | G  | 0.0115029  | 0.071164404   | 4.45E-11  |
| 19  | 45240584  | 19:45240584  | C  | T  | 0.12624    | 0.04628154    | 7.37E-45  |
| 19  | 45251156  | 19:45251156  | C  | A  | 0.413998   | -0.035063874  | 9.24E-58  |
| 19  | 45302951  | 19:45302951  | G  | A  | 0.128149   | -0.033533096  | 4.32E-25  |
| 19  | 45324138  | 19:45324138  | A  | G  | 0.291346   | 0.060741893   | 1.08E-144 |
| 19  | 45331994  | 19:45331994  | A  | G  | 0.237527   | -0.02237755   | 1.11E-18  |
| 19  | 45343579  | 19:45343579  | A  | G  | 0.120172   | -0.029036799  | 2.95E-18  |
| 19  | 45357939  | 19:45357939  | A  | G  | 0.481337   | -0.093037189  | 1.35E-69  |
| 19  | 45360488  | 19:45360488  | G  | T  | 0.00950108 | 0.165797318   | 9.62E-45  |
| 19  | 45363820  | 19:45363820  | G  | T  | 0.00680628 | 0.225470931   | 6.45E-66  |

|    |          |             |   |   |            |              |           |
|----|----------|-------------|---|---|------------|--------------|-----------|
| 19 | 45370941 | 19:45370941 | T | C | 0.0343086  | -0.047431249 | 1.83E-15  |
| 19 | 45378719 | 19:45378719 | T | C | 0.055867   | -0.042842615 | 7.63E-20  |
| 19 | 45382717 | 19:45382717 | G | A | 0.396212   | 0.043738423  | 4.03E-86  |
| 19 | 45384931 | 19:45384931 | A | G | 0.0100554  | 0.195491888  | 7.98E-65  |
| 19 | 45387596 | 19:45387596 | A | G | 0.129489   | 0.165266132  | 0         |
| 19 | 45395266 | 19:45395266 | G | A | 0.376763   | -0.070610622 | 1.88E-221 |
| 19 | 45403924 | 19:45403924 | T | C | 0.052279   | -0.045356269 | 8.87E-21  |
| 19 | 45405499 | 19:45405499 | A | G | 0.0223899  | -0.046348902 | 2.11E-10  |
| 19 | 45412079 | 19:45412079 | T | C | 0.0721435  | -0.088453729 | 4.73E-100 |
| 19 | 45412955 | 19:45412955 | C | A | 0.0260548  | 0.220257934  | 1.16E-232 |
| 19 | 45421100 | 19:45421100 | A | G | 0.414891   | -0.127218135 | 2.09E-125 |
| 19 | 45431403 | 19:45431403 | T | C | 0.0305051  | -0.03874658  | 6.44E-10  |
| 19 | 45461996 | 19:45461996 | G | A | 0.0536495  | -0.031183381 | 8.07E-11  |
| 19 | 45463386 | 19:45463386 | A | G | 0.0091777  | 0.171677454  | 3.96E-50  |
| 19 | 45477111 | 19:45477111 | T | C | 0.234447   | -0.014806885 | 6.24E-09  |
| 19 | 45490192 | 19:45490192 | G | A | 0.34053    | 0.02297834   | 7.25E-24  |
| 19 | 45530351 | 19:45530351 | T | C | 0.4095     | -0.034456262 | 1.41E-10  |
| 19 | 45542471 | 19:45542471 | T | C | 0.00612873 | 0.081532538  | 4.00E-08  |
| 19 | 45543755 | 19:45543755 | G | A | 0.0276101  | 0.058144769  | 8.95E-17  |
| 19 | 45549135 | 19:45549135 | A | G | 0.0213582  | 0.06874778   | 8.66E-18  |
| 19 | 45580372 | 19:45580372 | T | C | 0.041546   | 0.042832376  | 2.25E-15  |
| 19 | 45592475 | 19:45592475 | T | C | 0.113258   | -0.019445276 | 1.22E-08  |
| 19 | 45655333 | 19:45655333 | C | T | 0.10154    | 0.046612785  | 1.07E-38  |
| 19 | 45657486 | 19:45657486 | C | T | 0.488328   | -0.012558924 | 5.82E-09  |
| 19 | 45697020 | 19:45697020 | A | C | 0.0379119  | 0.036489973  | 1.35E-09  |
| 19 | 45708408 | 19:45708408 | C | T | 0.177087   | 0.028203502  | 4.65E-23  |
| 19 | 45712679 | 19:45712679 | A | G | 0.0170465  | 0.079489896  | 1.57E-21  |
| 19 | 45722743 | 19:45722743 | A | G | 0.0405143  | 0.032350982  | 2.57E-08  |
| 19 | 45729123 | 19:45729123 | C | T | 0.0567755  | 0.033465391  | 7.60E-13  |
| 19 | 45734751 | 19:45734751 | G | A | 0.389128   | -0.016143004 | 4.49E-13  |
| 19 | 45830947 | 19:45830947 | A | G | 0.392116   | -0.012247909 | 3.21E-08  |
| 19 | 51727962 | 19:51727962 | A | C | 0.299276   | -0.013757048 | 5.15E-09  |
| 20 | 54998544 | 20:54998544 | G | A | 0.0950416  | -0.022894258 | 5.38E-10  |

CHR: Chromosome, BP: Base Pair, A1: Effect allele, A2: Other allele, freq: Frequency, Beta: Beta-coefficient (weight), P: P value.

## Supplementary table 25: SNPs used to calculate the AD-PRS excluding APOE (Mayo Clinic)

Description of SNPs, weights and p values used to calculate the AD-PRS excluding APOE in the Mayo Clinic samples.

| CHR | BP        | SNP         | A1 | A2 | freq       | beta (weight) | P        |
|-----|-----------|-------------|----|----|------------|---------------|----------|
| 1   | 161155392 | 1:161155392 | A  | G  | 0.228026   | 0.016411633   | 1.90E-10 |
| 1   | 207750568 | 1:207750568 | T  | C  | 0.171481   | 0.025417699   | 6.83E-19 |
| 2   | 127891427 | 2:127891427 | C  | A  | 0.411349   | 0.031095063   | 1.45E-44 |
| 2   | 234069512 | 2:234069512 | C  | A  | 0.466846   | 0.012969003   | 2.50E-09 |
| 4   | 11026028  | 4:11026028  | A  | G  | 0.262473   | 0.014704637   | 1.98E-09 |
| 6   | 32415153  | 6:32415153  | T  | C  | 0.165368   | 0.018782338   | 9.91E-11 |
| 6   | 32571122  | 6:32571122  | T  | C  | 0.13012    | -0.020827485  | 8.55E-11 |
| 6   | 32572082  | 6:32572082  | C  | T  | 0.431906   | 0.012420404   | 2.09E-08 |
| 6   | 41129207  | 6:41129207  | T  | C  | 0.00746843 | 0.073707877   | 3.02E-08 |
| 6   | 47432637  | 6:47432637  | C  | T  | 0.355744   | 0.0144515     | 1.99E-10 |
| 7   | 99785750  | 7:99785750  | T  | C  | 0.153295   | 0.016803856   | 3.29E-08 |

|    |           |              |   |   |           |              |          |
|----|-----------|--------------|---|---|-----------|--------------|----------|
| 7  | 99971834  | 7:99971834   | A | G | 0.32433   | -0.018395737 | 1.80E-15 |
| 7  | 143108158 | 7:143108158  | T | C | 0.485387  | -0.01451867  | 2.89E-11 |
| 8  | 27195121  | 8:27195121   | C | T | 0.365676  | 0.015322448  | 8.49E-12 |
| 8  | 27322974  | 8:27322974   | A | G | 0.0860179 | -0.022969232 | 2.79E-09 |
| 8  | 27464929  | 8:27464929   | A | G | 0.377826  | -0.020161433 | 1.48E-19 |
| 8  | 27494366  | 8:27494366   | C | T | 0.0339544 | -0.032869537 | 3.59E-08 |
| 10 | 11717397  | 10:11717397  | C | T | 0.360964  | 0.012943374  | 1.04E-08 |
| 11 | 59958380  | 11:59958380  | A | C | 0.382122  | -0.017870026 | 1.11E-15 |
| 11 | 85776544  | 11:85776544  | G | A | 0.317416  | -0.020428916 | 1.48E-18 |
| 11 | 121435587 | 11:121435587 | C | T | 0.0440715 | -0.035926385 | 8.12E-12 |
| 14 | 92938855  | 14:92938855  | A | G | 0.33648   | -0.014826611 | 1.32E-10 |
| 15 | 59022615  | 15:59022615  | C | T | 0.354342  | -0.013721107 | 1.22E-09 |
| 15 | 63569902  | 15:63569902  | T | C | 0.124823  | 0.01802674   | 3.44E-08 |
| 16 | 31133100  | 16:31133100  | A | G | 0.298476  | -0.012985226 | 3.73E-08 |
| 17 | 5138980   | 17:5138980   | A | G | 0.126086  | 0.019985799  | 7.91E-10 |
| 17 | 47450775  | 17:47450775  | A | G | 0.453265  | 0.01230151   | 1.68E-08 |
| 18 | 56189459  | 18:56189459  | C | T | 0.0111949 | 0.0567967    | 3.38E-08 |
| 19 | 1043638   | 19:1043638   | T | C | 0.247644  | 0.015923035  | 2.38E-10 |
| 19 | 45020859  | 19:45020859  | A | G | 0.0308747 | 0.044234873  | 1.28E-12 |
| 19 | 45048858  | 19:45048858  | A | G | 0.0326609 | 0.045591355  | 1.49E-12 |
| 19 | 45078886  | 19:45078886  | G | A | 0.370126  | -0.017057993 | 3.36E-14 |
| 19 | 51727962  | 19:51727962  | A | C | 0.299276  | -0.013757048 | 5.15E-09 |
| 20 | 54998544  | 20:54998544  | G | A | 0.0950416 | -0.022894258 | 5.38E-10 |

CHR: Chromosome, BP: Base Pair, A1: Effect allele, A2: Other allele, freq: Frequency, Beta: Beta-coefficient (weight), P: P value.
